# Supplementary material for: Impaired energy metabolism of senescent muscle satellite cells is associated with oxidative modifications of glycolytic enzymes
Source: PubMed Central journal article supplement (PMC5270674; doi:10.18632/aging.101126), 2016-12-04
Supplement: aging-08-3375-s001.pdf [file aging-08-3375-s001.pdf]

## SUPPLEMENTARY MATERIAL

Please browse links in Full Text version to see Supplementary Material listings:

**Table S1.** Carbonylated proteins in senescent myoblasts

**Table S2.** Proteins modified by glycation adducts in senescent myoblasts

**Table S3.** HNE modified proteins in senescent satellite cells

**Data Set 1.** Pathway heat map of statistically significant biochemicals profiled in this study.
