# Supplementary material for: Impaired energy metabolism of senescent muscle satellite cells is associated with oxidative modifications of glycolytic enzymes
Source: Aging (Albany NY). 2016 Dec 4;8(12):3375–88. doi: 10.18632/aging.101126 (PMC5270674; doi:10.18632/aging.101126)
Supplement: Supplementary file 5 [file aging-08-3375-s005.xlsx]

## Sheet: Explanation
	OrigScale	Values are normalized in terms of raw area counts.
		Note: for a single day run, this is equivalent to the raw data
	ProNormImpData	Values for biochemical in OrigScale are normalized by Bradford protein assay values.
		Each biochemical is then re-scaled to have median equal to 1.
		Missing values are imputed with the minimum.
	Pathway Heat Map	This is the heatmap associated with the statistical analysis of the data
		Indicates ratios, p- and q-values for each comparison
		0.55	Green: indicates significant difference (p≤0.05) between the groups shown; GREEN indicates a ratio < 1
		1.71	Red: indicates significant difference (p≤0.05) between the groups shown; RED indicates a ratio > 1
		1.23	Blue-bolded: indicates difference with (0.05<p<0.10) between groups
		1.2	Non-colored text and cell: mean values are not significantly different for that comparison
	* indicates compounds that have not been officially "plexed" (based on a standard), but we are confident in its identity
	Box Plots-Alpha	Box plots are provided for each biochemical detected, sorted alphabetically by biochemical name.
	Box Plots-Pathway	Box plots are provided for each biochemical detected, sorted by biochemical pathway.

## Sheet: Pathway Heat Map
Metabolomic study of young (CPD 30) and senescent human myoblasts
Heat map of statistically significant biochemicals profiled in this study. Shaded cells indicate p≤0.05 (red indicates that the mean values are significantly higher for that comparison; green values significantly lower). Blue-bolded text indicates 0.05<p<0.10. All data are normalized to Bradford protein assay values.
								FOLD CHANGE		Mean Values
PATHWAY SORT	SUPER PATHWAY	SUB PATHWAY	BIOCHEMICAL NAME	PLATFORM	COMP ID	Kegg	HMDB	MS/MY	FIS FY	FIS FS	FY MY	FS MS		MS / MY		SUPER PATHWAY	CAS	RI	MASS
														P-VALUE	Q-VALUE
1	Amino acid	Glycine, serine and threonine metabolism	glycine	GC/MS	11777	C00037	HMDB00123	0.61	1.34	1.04	0.32	0.66		0.00157835	0.00122005	100	Amino acid	Glycine, serine and threonine metabolism	56-40-6;	1166	101.9
8			serine	GC/MS	1648	C00065	HMDB03406	1.81	1.65	2.43	0.77	0.29		< 0.001	0.000175427	100	Amino acid	Glycine, serine and threonine metabolism	56-45-1;	1389.1	204
10			N-acetylserine	GC/MS	37076		HMDB02931	0.58	0.61	0.42	0.3	0.75		0.003449	0.00222864	100	Amino acid	Glycine, serine and threonine metabolism	97-14-3;	1526	218
17			threonine	GC/MS	1284	C00188	HMDB00167	1.02	1.49	1.46	0.49	0.49		0.930899	0.25036	100	Amino acid	Glycine, serine and threonine metabolism	72-19-5;	1412.3	218.1
18			N-acetylthreonine	LC/MS neg	33939	C01118		1.2	0.62	0.4	0.24	0.31		0.246698	0.0836243	100	Amino acid	Glycine, serine and threonine metabolism		846	160.1
21			betaine	LC/MS pos	3141		HMDB00043	0.51	0.45	0.34	0.4	1.04		< 0.001	4.51376e-05	100	Amino acid	Glycine, serine and threonine metabolism	107-43-7;	721	118.2
24		Alanine and aspartate metabolism	aspartate	GC/MS	15996	C00049	HMDB00191	0.94	0.63	0.39	0.59	1.01		0.305205	0.101788	100	Amino acid	Alanine and aspartate metabolism	56-84-8;	1529.7	232
25			asparagine	GC/MS	11398	C00152	HMDB00168	0.4	1.71	1.74	0.27	0.66		< 0.001	0.000495107	100	Amino acid	Alanine and aspartate metabolism	70-47-3;	1651.2	231
28			beta-alanine	GC/MS	55	C00099	HMDB00056	1.29	0.66	0.17	0.09	0.28		0.0678073	0.0290587	100	Amino acid	Alanine and aspartate metabolism	56-41-7;107-95-9;	1451.8	174
32			alanine	GC/MS	1126	C00041	HMDB00161	1.01	1.33	1.45	0.24	0.22		0.950144	0.253603	100	Amino acid	Alanine and aspartate metabolism	56-41-7;	1147.6	115.9
33			N-acetylalanine	LC/MS neg	1585	C02847	HMDB00766	0.5	0.92	0.86	0.42	0.88		< 0.001	0.000267896	100	Amino acid	Alanine and aspartate metabolism	97-69-8;	882	130.1
35			N-acetylaspartate (NAA)	LC/MS pos	22185	C01042	HMDB00812	1.31	1.29	1.64	0.88	0.53		0.0240329	0.0116927	100	Amino acid	Alanine and aspartate metabolism	997-55-7;997-55-7 ;	1222	176.1
39		Glutamate metabolism	glutamate	LC/MS pos	57	C00025	HMDB03339	1.21	0.89	0.73	0.27	0.27		< 0.001	0.000151004	100	Amino acid	Glutamate metabolism	56-86-0;	700	148.1
44			glutamate, gamma-methyl ester	LC/MS pos	33487			0.5	2.31	1.41	0.49	1.59		0.0131597	0.00706776	100	Amino acid	Glutamate metabolism	1499-55-4 ;	1062	162.1
45			glutamine	LC/MS pos	53	C00064	HMDB00641	1.21	3.44	1.45	0.43	0.84		0.0709515	0.0299407	100	Amino acid	Glutamate metabolism	56-85-9;	684	147.2
46			pyroglutamine*	LC/MS pos	32672			1.41	1.17	0.58	0.27	0.38		< 0.001	4.51376e-05	100	Amino acid	Glutamate metabolism		764	129.2
47			gamma-aminobutyrate (GABA)	GC/MS	1416	C00334	HMDB00112	1.33	0.69	0.44	0.13	0.15		0.00620363	0.00366501	100	Amino acid	Glutamate metabolism	56-12-2;	1539.7	304.1
50			N-acetylglutamate	LC/MS pos	15720	C00624	HMDB01138	1.51	0.61	0.41	0.48	0.47		< 0.001	0.000517004	100	Amino acid	Glutamate metabolism	5817-08-3;	1492	190.1
51			N-acetyl-aspartyl-glutamate (NAAG)	LC/MS pos	35665	C12270	HMDB01067	2.35	1.28	1.3	0.41	0.17		< 0.001	0.000129477	33.3333	Amino acid	Glutamate metabolism	3106-85-2;	1563	305
53		Histidine metabolism	histidine	LC/MS neg	59	C00135	HMDB00177	1.01	0.99	1.07	0.82	0.75		0.950515	0.253603	100	Amino acid	Histidine metabolism	5934-29-2;	757	154.1
75		Lysine metabolism	lysine	GC/MS	1301	C00047	HMDB00182	0.72	0.84	0.9	1.47	1.92		0.00701322	0.00405638	100	Amino acid	Lysine metabolism	56-87-1;	1836.7	317.2
77			2-aminoadipate	GC/MS	6146	C00956	HMDB00510	0.87	0.15	0.14	1.92	2.37		0.0886873	0.0356083	100	Amino acid	Lysine metabolism	542-32-5;1118-90-7;	1686.5	260.1
80			pipecolate	LC/MS pos	1444	C00408	HMDB00070	0.87	0.65	0.55	3.54	4.86		0.843293	0.231519	100	Amino acid	Lysine metabolism	4043-87-2;	1120	130.1
85			N6-acetyllysine	LC/MS pos	36752	C02727	HMDB00206	0.61	0.96	0.96	1.07	1.76		< 0.001	7.57283e-05	100	Amino acid	Lysine metabolism	692-04-6;	1134	189.1
89		Phenylalanine & tyrosine metabolism	phenylalanine	LC/MS pos	64	C00079	HMDB00159	1.03	0.91	1.03	0.83	0.71		0.727768	0.20699	100	Amino acid	Phenylalanine & tyrosine metabolism	63-91-2;	2056	166.1
106			tyrosine	LC/MS pos	1299	C00082	HMDB00158	1.48	1.03	1.07	0.87	0.56		< 0.001	0.000237223	100	Amino acid	Phenylalanine & tyrosine metabolism	60-18-4;	1516	182.1
107			3-(4-hydroxyphenyl)lactate	LC/MS neg	32197	C03672	HMDB00755	0.67	0.34	0.37	0.97	1.32		0.00381112	0.00240624	100	Amino acid	Phenylalanine & tyrosine metabolism	6482-98-0;	1395	181.1
134			phenylacetylglycine	LC/MS neg	33945	C05598	HMDB00821	0.81	0.47	0.45	0.84	1.07		0.0786928	0.0322211	100	Amino acid	Phenylalanine & tyrosine metabolism	500-98-1;	2377	192.1
152		Tryptophan metabolism	kynurenine	LC/MS pos	15140	C00328	HMDB00684	0.66	0.29	0.46	1.42	1.35		0.00352741	0.00226164	100	Amino acid	Tryptophan metabolism	2922-83-0;	1902	209.1
153			tryptophan	LC/MS pos	54	C00078	HMDB00929	1.09	0.8	0.77	0.81	0.78		0.310953	0.103289	100	Amino acid	Tryptophan metabolism	73-22-3;	2445	205.1
172			C-glycosyltryptophan*	LC/MS pos	32675			3.46	0.47	0.37	0.46	0.17		< 0.001	3.28096e-07	100	Amino acid	Tryptophan metabolism		1912	367.1
183		Valine, leucine and isoleucine metabolism	3-methyl-2-oxovalerate	LC/MS neg	15676	C00671	HMDB03736	1.57	0.99	0.84	1.08	0.81		0.185192	0.0663488	16.6667	Amino acid	Valine, leucine and isoleucine metabolism	51829-07-3;	2106	129.2
190			isoleucine	LC/MS pos	1125	C00407	HMDB00172	1.1	0.82	0.83	0.77	0.69		0.194629	0.068501	100	Amino acid	Valine, leucine and isoleucine metabolism	73-32-5;	1614	132.1
191			leucine	LC/MS pos	60	C00123	HMDB00687	1.43	1.05	1.17	0.75	0.48		0.00208063	0.00145838	100	Amino acid	Valine, leucine and isoleucine metabolism	61-90-5;	1674	132.2
200			valine	LC/MS pos	1649	C00183	HMDB00883	1.31	1.01	1.13	0.77	0.52		0.0189444	0.00960836	100	Amino acid	Valine, leucine and isoleucine metabolism	72-18-4;	1040	118.1
202			3-hydroxyisobutyrate	GC/MS	1549	C06001	HMDB00336	0.79	0.92	0.57	0.74	1.51		0.625103	0.185312	100	Amino acid	Valine, leucine and isoleucine metabolism	2068-83-9;	1205	177.11
203			4-methyl-2-oxopentanoate	LC/MS neg	22116	C00233	HMDB00695	1.49	1	1.12	1.32	0.79		0.354923	0.11603	33.3333	Amino acid	Valine, leucine and isoleucine metabolism	816-66-0;	2200	129.2
210			isobutyrylcarnitine	LC/MS pos	33441			3.11	0.48	0.24	0.32	0.2		< 0.001	3.53894e-07	100	Amino acid	Valine, leucine and isoleucine metabolism	25518-49-4;	1941	232.2
212			2-methylbutyroylcarnitine	LC/MS pos	35431		HMDB00378	2.15	0.3	0.17	0.5	0.42		< 0.001	1.3728e-06	100	Amino acid	Valine, leucine and isoleucine metabolism	31023-25-3;	2439	246.1
215			isovalerylcarnitine	LC/MS pos	34407		HMDB00688	1.35	0.27	0.18	0.25	0.28		0.00362452	0.00230603	100	Amino acid	Valine, leucine and isoleucine metabolism		2533	246.2
216			hydroxyisovaleroyl carnitine	LC/MS pos	35433			2.89	0.68	0.36	2.25	1.45		< 0.001	1.21017e-05	100	Amino acid	Valine, leucine and isoleucine metabolism	99159-87-2;	1683	262.1
217			tiglyl carnitine	LC/MS pos	35428		HMDB02366	1.4	0.75	0.4	0.63	0.85		0.0933532	0.0369437	100	Amino acid	Valine, leucine and isoleucine metabolism	64191-86-2;	2317	244.1
224		Cysteine, methionine, SAM, taurine metabolism	cysteine	GC/MS	31453	C00097	HMDB00574	3.19	1.34	0.85	2.33	1.15		< 0.001	6.45574e-05	100	Amino acid	Cysteine, methionine, SAM, taurine metabolism	52-90-4;56-89-3;	1560.1	218
226			cysteine sulfinic acid	GC/MS	37443	C00606	HMDB00996	0.31	1.98	3.23	1.29	2.52		0.00225138	0.00155176	100	Amino acid	Cysteine, methionine, SAM, taurine metabolism	207121-48-0;	1662	252
229			cystathionine	GC/MS	15705	C02291	HMDB00099	0.31	0.42	0.25	1.37	7.34		< 0.001	8.3937e-07	100	Amino acid	Cysteine, methionine, SAM, taurine metabolism	535-34-2;	1979.6	218.1
230			methionine sulfoxide	LC/MS pos	18374	C02989	HMDB02005	0.74	2.65	3.57	0.84	0.84		0.0124024	0.00679337	100	Amino acid	Cysteine, methionine, SAM, taurine metabolism	3226-65-1;	729	166.1
231			N-formylmethionine	LC/MS neg	2829	C03145	HMDB01015	0.49	0.57	0.52	0.68	1.5		< 0.001	0.000392891	100	Amino acid	Cysteine, methionine, SAM, taurine metabolism	4289-98-9;	1541	176.1
232			hypotaurine	GC/MS	590	C00519	HMDB00965	2	0.76	0.5	0.18	0.14		< 0.001	0.000263933	100	Amino acid	Cysteine, methionine, SAM, taurine metabolism	300-84-5;	1598.5	188
233			taurine	GC/MS	2125	C00245	HMDB00251	2.11	0.95	0.81	0.11	0.06		< 0.001	3.34856e-06	100	Amino acid	Cysteine, methionine, SAM, taurine metabolism	107-35-7;	1616.4	254.1
236			S-adenosylhomocysteine (SAH)	LC/MS neg	15948	C00021	HMDB00939	0.97	0.58	0.57	1.06	1.11		0.73667	0.207952	100	Amino acid	Cysteine, methionine, SAM, taurine metabolism	979-92-0;	1821	383.1
237			methionine	LC/MS pos	1302	C00073	HMDB00696	1.07	1.07	1.22	0.85	0.69		0.531667	0.161077	100	Amino acid	Cysteine, methionine, SAM, taurine metabolism	63-68-3;	1252	150.1
239			N-acetylmethionine	LC/MS neg	1589	C02712	HMDB11745	0.37	0.88	1.19	0.78	1.54		< 0.001	1.87908e-05	100	Amino acid	Cysteine, methionine, SAM, taurine metabolism	65-82-7;	1805	190.1
254		Urea cycle; arginine-, proline-, metabolism	dimethylarginine (SDMA + ADMA)	LC/MS pos	36808	C03626	HMDB01539,HMDB03334	0.38	1.09	1.55	0.82	1.51		< 0.001	3.49477e-06	100	Amino acid	Urea cycle; arginine-, proline-, metabolism		812	203.2
255			arginine	LC/MS pos	1638	C00062	HMDB00517	1.51	1.34	1.34	0.72	0.47		0.00152408	0.00118921	100	Amino acid	Urea cycle; arginine-, proline-, metabolism	1119-34-2;	650	175.2
258			ornithine	GC/MS	1493	C00077	HMDB03374	0.73	1.18	1.01	0.25	0.39		0.00460446	0.00280025	100	Amino acid	Urea cycle; arginine-, proline-, metabolism	3184-13-2;	1763.8	141.9
260			urea	GC/MS	1670	C00086	HMDB00294	0.82	2.04	1.98	1.38	1.72		0.0757456	0.0313245	100	Amino acid	Urea cycle; arginine-, proline-, metabolism	57-13-6;	1223.9	171
261			proline	LC/MS pos	1898	C00148	HMDB00162	0.78	1.01	0.86	0.24	0.37		0.00187433	0.00137191	100	Amino acid	Urea cycle; arginine-, proline-, metabolism	147-85-3;	796	116.1
262			5-aminovalerate	LC/MS pos	18319	C00431	HMDB03355	1.55	0.73	0.42	0.55	0.61		< 0.001	0.000583194	100	Amino acid	Urea cycle; arginine-, proline-, metabolism	660-88-8;	860	118.1
263			citrulline	LC/MS pos	2132	C00327	HMDB00904	12.16	0.59	0.4	0.74	0.09		< 0.001	3.28096e-07	100	Amino acid	Urea cycle; arginine-, proline-, metabolism	372-75-8;	715	176.1
264			N-acetylornithine	LC/MS pos	15630	C00437	HMDB03357	0.52	0.76	0.87	1.1	1.86		0.00237674	0.00161131	100	Amino acid	Urea cycle; arginine-, proline-, metabolism	6205-08-9;	875	175.2
267			trans-4-hydroxyproline	LC/MS pos	32306	C01157	HMDB00725	0.6	0.66	0.48	0.2	0.47		< 0.001	1.33282e-05	100	Amino acid	Urea cycle; arginine-, proline-, metabolism	51-35-4;	705	132.1
274		Creatine metabolism	creatine	LC/MS pos	27718	C00300	HMDB00064	1.38	0.89	0.59	0.3	0.33		< 0.001	0.000199297	100	Amino acid	Creatine metabolism	57-00-1;	758	132.1
275			creatinine	LC/MS pos	513	C00791	HMDB00562	1	0.87	0.83	0.62	0.65		0.96899	0.256875	100	Amino acid	Creatine metabolism	60-27-5;	730	114.1
278		Butanoate metabolism	2-aminobutyrate	GC/MS	1577	C02261	HMDB00650	0.42	0.91	0.93	0.44	1.04		< 0.001	0.000508249	100	Amino acid	Butanoate metabolism	1492-24-6;	1215.7	130
281		Polyamine metabolism	5-methylthioadenosine (MTA)	LC/MS pos	1419	C00170	HMDB01173	0.68	0.38	0.23	0.45	1.05		< 0.001	0.000673666	100	Amino acid	Polyamine metabolism	2457-80-9;	2427	298.1
282			putrescine	GC/MS	1408	C00134	HMDB01414	1.66	0.33	0.29	0.36	0.24		< 0.001	5.24437e-05	100	Amino acid	Polyamine metabolism	110-60-1;	1705.8	174
283			N-acetylputrescine	LC/MS pos	37496	C02714	HMDB02064	0.75	0.6	0.64	0.23	0.29		0.0449653	0.0201031	100	Amino acid	Polyamine metabolism	18233-70-0;	895	131.1
284			agmatine	GC/MS	15496	C00179	HMDB01432	1.02	1	1	0.5	0.5		0.931348	0.25036	0	Amino acid	Polyamine metabolism	2482-00-0;	1526	174
285			spermidine	LC/MS pos	485	C00315	HMDB01257	0.98	0.77	1.11	0.61	0.43		0.649704	0.190557	100	Amino acid	Polyamine metabolism	124-20-9;	533	146.2
288			spermine	LC/MS pos	603	C00750	HMDB01256	1.12	1.61	0.92	0.67	1.03		0.674294	0.195003	83.3333	Amino acid	Polyamine metabolism	71-44-3;	506	203.2
290		Guanidino and acetamido metabolism	4-guanidinobutanoate	LC/MS pos	15681	C01035	HMDB03464	1.32	0.52	0.53	0.32	0.24		0.00192932	0.00137564	100	Amino acid	Guanidino and acetamido metabolism	463-003;463-00-3;	1085	146.1
291			4-acetamidobutanoate	LC/MS pos	1558	C02946	HMDB03681	0.26	1	1	0.26	1		0.00715283	0.0041084	0	Amino acid	Guanidino and acetamido metabolism	3025-96-5;	1724	146.1
295		Glutathione metabolism	glutathione, reduced (GSH)	LC/MS pos	2127	C00051	HMDB00125	1.66	0.91	0.72	0.69	0.52		< 0.001	3.28096e-07	100	Amino acid	Glutathione metabolism	70-18-8;	1274	308.1
297			5-oxoproline	LC/MS neg	1494	C01879	HMDB00267	1.07	0.66	0.66	0.96	0.9		0.494458	0.152032	100	Amino acid	Glutathione metabolism	98-79-3;	744	128.2
298			glutathione, oxidized (GSSG)	LC/MS pos	27727	C00127	HMDB03337	1.31	1.42	1.11	0.93	0.91		< 0.001	0.000171388	100	Amino acid	Glutathione metabolism	103239-24-3;	1535	613.1
299			cysteine-glutathione disulfide	LC/MS pos	35159		HMDB00656	1.11	1.67	1.59	1.28	1.22		0.203311	0.0706546	100	Amino acid	Glutathione metabolism	13081-14-6;	821	427.1
300			ophthalmate	LC/MS pos	34592		HMDB05765	1.45	0.56	0.85	3.07	1.4		0.00136763	0.00110898	100	Amino acid	Glutathione metabolism	495-27-2;	1457	290.1
303			norophthalmate*	LC/MS pos	39251		HMDB05766	5.64	0.94	1.57	2.6	0.28		< 0.001	1.43722e-06	100	Amino acid	Glutathione metabolism	1116-21-8;	989	276.1
311	Peptide	Dipeptide	glycylvaline	LC/MS pos	18357			2	0.88	2.22	1.46	0.29		< 0.001	0.000101725	100	Peptide	Dipeptide	1963-21-9;	1572	175.1
312			glycylglycine	GC/MS	21029	C02037	HMDB11733	0.74	1.04	1.41	1.43	1.44		0.0356712	0.0164935	100	Peptide	Dipeptide	556-50-3;	1757.9	174
314			glycylproline	LC/MS pos	22171		HMDB00721	0.85	1.55	2.68	0.57	0.39		0.152634	0.0568663	100	Peptide	Dipeptide	704-15-4;	1115	173.1
315			glycylisoleucine	LC/MS pos	36659			0.74	0.63	0.76	1.13	1.24		0.0087544	0.00488766	100	Peptide	Dipeptide	19461-38-2;	2080	189.1
316			glycylleucine	LC/MS pos	34398	C02155	HMDB00759	0.58	0.61	1.81	0.96	0.56		0.00145371	0.00115314	100	Peptide	Dipeptide	869-19-2;	2236	189.1
318			glycylglutamate	GC/MS	34403			1	0.5	0.37	5.7	7.57				100	Peptide	Dipeptide	7412-78-4;	1969	549.3
319			glycylphenylalanine	LC/MS neg	33954			0.95	1.13	3.37	0.69	0.24		0.558211	0.166677	100	Peptide	Dipeptide	3321-03-7;	2193	221.2
340			aspartylphenylalanine	LC/MS pos	22175		HMDB00706	0.71	1.45	2.23	0.18	0.16		0.0919852	0.036754	100	Peptide	Dipeptide	13433-09-5;	2538	281.1
347			prolylglycine	LC/MS pos	40703			0.83	0.76	0.81	0.32	0.36		0.149104	0.0560563	100	Peptide	Dipeptide	2578-57-6;	875	173.1
348			prolylalanine	LC/MS pos	40705			0.56	1.32	3.25	0.36	0.26		0.018156	0.00926964	100	Peptide	Dipeptide	6422-36-2;	925	187.1
359			leucylproline	LC/MS pos	35663		HMDB11175	1.77	1.18	2.64	0.25	0.06		0.029013	0.0138709	100	Peptide	Dipeptide	87178-63-0;	2395	229.1
363			pro-hydroxy-pro	LC/MS pos	35127		HMDB06695	0.38	0.32	0.37	0.19	0.44		< 0.001	4.46218e-05	100	Peptide	Dipeptide	18684-24-7;	960	229.2
376			cysteinylglycine	GC/MS	35637	C01419	HMDB00078	1.4	0.83	0.8	1.09	0.8		0.00206287	0.00145829	100	Peptide	Dipeptide	19246-18-5;	1763	257
390			aspartylleucine	LC/MS pos	40068			0.43	1	1.61	0.27	0.39		0.00184275	0.00136084	100	Peptide	Dipeptide	3062-14-4;	2310	247.2
402			isoleucylalanine	LC/MS pos	40046			0.75	0.8	1.1	0.61	0.59		0.0676147	0.0290587	100	Peptide	Dipeptide	24787-73-3;	1686	203.2
405			isoleucylglutamine	LC/MS pos	40019			1.09	0.69	0.93	0.63	0.43		0.674004	0.195003	100	Peptide	Dipeptide		1530	260.2
406			isoleucylglycine	LC/MS pos	40008			0.52	0.68	1.34	0.45	0.44		0.00176564	0.00131564	100	Peptide	Dipeptide	868-28-0;	1732	189.2
409			isoleucylserine	LC/MS pos	40012			0.55	0.5	0.59	0.51	0.78		0.00424734	0.00263998	100	Peptide	Dipeptide	6403-14-1;	1472.5	219.2
417			leucylglutamate	LC/MS pos	40021			1.19	0.87	1.23	0.76	0.45		0.375623	0.121834	100	Peptide	Dipeptide		1716	261.2
418			leucylglycine	LC/MS pos	40045			2.18	0.76	1.53	0.58	0.13		< 0.001	0.000104984	100	Peptide	Dipeptide	686-50-0;	1800	189.2
430			phenylalanylserine	LC/MS pos	40016			0.83	0.53	1.17	0.64	0.35		0.204567	0.0707939	100	Peptide	Dipeptide	16053-39-7;	1808	253.1
431			serylleucine	LC/MS pos	40066			0.56	0.74	1.25	0.57	0.61		0.219643	0.0752833	83.3333	Peptide	Dipeptide	6665-16-3;	2106	219.2
432			serylphenyalanine	LC/MS pos	40054			1.02	1.16	1.66	0.5	0.34		0.628712	0.185717	100	Peptide	Dipeptide		2348	253.2
433			threonylleucine	LC/MS pos	40051			1.47	0.99	1.25	0.65	0.35		0.0799083	0.0325576	100	Peptide	Dipeptide	50299-12-2;	2204	233.2
449			valylglycine	LC/MS pos	40475			0.74	0.41	1.31	1.25	0.53		0.0588682	0.0257618	100	Peptide	Dipeptide	686-43-1;	1330	175.1
455		Dipeptide derivative	carnosine	LC/MS neg	1768	C00386	HMDB00033	2.37	1	1	0.95	0.4		< 0.001	4.07865e-05	0	Peptide	Dipeptide derivative	305-84-0;	813	225.2
460		gamma-glutamyl	gamma-glutamylvaline	LC/MS pos	32393		HMDB11172	1.8	0.18	0.26	8.45	3.14		< 0.001	2.66243e-05	100	Peptide	gamma-glutamyl	2746-34-1;	2040	247.2
462			gamma-glutamylleucine	LC/MS pos	18369		HMDB11171	1.52	0.24	0.38	6.72	2.77		< 0.001	0.000654956	100	Peptide	gamma-glutamyl	2566-39-4;	2744	261.2
463			gamma-glutamylisoleucine*	LC/MS pos	34456		HMDB11170	1.77	0.22	0.28	5.99	2.7		< 0.001	0.000233653	100	Peptide	gamma-glutamyl		2644	261.2
466			gamma-glutamylmethionine	LC/MS pos	37539			1.12	1.41	1.29	1.74	1.69		0.955794	0.254192	100	Peptide	gamma-glutamyl	17663-87-5;	1993	279.2
467			gamma-glutamylglutamate	LC/MS pos	36738			2.45	1.3	0.91	1.01	0.59		< 0.001	4.81415e-06	100	Peptide	gamma-glutamyl	1116-22-9;	1036	277.1
470			gamma-glutamylphenylalanine	LC/MS pos	33422		HMDB00594	1.4	0.71	0.81	2.67	1.68		0.00303873	0.00199471	100	Peptide	gamma-glutamyl	7432-24-8;	2846	295.1
472			gamma-glutamylthreonine*	LC/MS pos	33364			1.48	0.65	1.48	8.56	2.54		0.0386339	0.0175572	100	Peptide	gamma-glutamyl	5652-48-2;	977	249.1
492		Polypeptide	pro-pro-pro	LC/MS pos	40654			0.76	1.19	1.56	0.96	0.96		0.0160521	0.0083217	100	Peptide	Polypeptide	19285-44-0;	1720.1	310.2
513	Carbohydrate	Aminosugars metabolism	N-acetylglucosamine 6-phosphate	LC/MS neg	15107	C00357	HMDB02817	1	0.92	4.65	5.07	1				100	Carbohydrate	Aminosugars metabolism	102029-88-9;	628	300.1
515			erythronate*	GC/MS	33477		HMDB00613	2.51	1.03	0.75	0.12	0.07		< 0.001	7.7622e-07	100	Carbohydrate	Aminosugars metabolism	13752-84-6;	1546.9	292.1
517			N-acetylneuraminate	GC/MS	1592	C00270	HMDB00230	0.62	0.72	0.82	0.6	0.85		< 0.001	0.000141921	100	Carbohydrate	Aminosugars metabolism	131-48-6;	2074.9	245
519			Isobar: UDP-acetylglucosamine, UDP-acetylgalactosamine	LC/MS neg	38673			0.81	1.16	0.45	0.51	1.61		0.109787	0.0428323	100	Carbohydrate	Aminosugars metabolism		661	606.1
523			fucose	GC/MS	15821	C00382	HMDB00174	1.16	0.59	1.07	1.14	0.54		0.0754856	0.0313245	100	Carbohydrate	Aminosugars metabolism	2438-80-4;	1682.2	204
537		Fructose, mannose, galactose, starch, and sucrose metabolism	fructose	GC/MS	31266	C00095	HMDB00660	0.44	2.19	3.49	0.36	0.52		0.00427709	0.00263998	100	Carbohydrate	Fructose, mannose, galactose, starch, and sucrose metabolism	57-48-7;	1762.7	204
539			galactose	GC/MS	12055	C01582	HMDB00143	0.96	1.08	4.96	6.64	1.52		0.808048	0.224274	100	Carbohydrate	Fructose, mannose, galactose, starch, and sucrose metabolism	59-23-4;	1793.8	203.9
544			lactose	GC/MS	567	C00243	HMDB00186	0.61	0.24	0.25	6.55	10.34		< 0.001	0.000200386	100	Carbohydrate	Fructose, mannose, galactose, starch, and sucrose metabolism	5965-66-2;	2134	204
545			6'-sialyllactose	GC/MS	39795	G00265	HMDB06569	2.99	0.4	0.54	0.52	0.13		< 0.001	0.000278747	100	Carbohydrate	Fructose, mannose, galactose, starch, and sucrose metabolism	35890-39-2;	2071.5	285.1
548			mannitol	GC/MS	15335	C00392	HMDB00765	1.31	1.08	0.95	0.18	0.15		0.05274	0.0233268	66.6667	Carbohydrate	Fructose, mannose, galactose, starch, and sucrose metabolism	69-65-8;	1839	319.1
554			mannose-6-phosphate	GC/MS	1470	C00275	HMDB01078	0.39	1.92	1.85	0.09	0.25		< 0.001	0.000183209	100	Carbohydrate	Fructose, mannose, galactose, starch, and sucrose metabolism	70442-25-0;104872-94-8;	2035.9	387.2
560			sorbitol	GC/MS	15053	C00794	HMDB00247	1.4	0.61	0.21	0.28	0.58		0.0120819	0.00666195	100	Carbohydrate	Fructose, mannose, galactose, starch, and sucrose metabolism	6706-59-8;	1843	319.1
585		Glycolysis, gluconeogenesis, pyruvate metabolism	glycerate	GC/MS	1572	C00258	HMDB00139	1.03	1.52	13.48	5.67	0.62		0.845351	0.231519	100	Carbohydrate	Glycolysis, gluconeogenesis, pyruvate metabolism	600-19-1;	1360.7	189
587			glucose-6-phosphate (G6P)	GC/MS	31260	C00668	HMDB01401	0.56	2.45	3.22	0.08	0.11		0.00868421	0.00488619	100	Carbohydrate	Glycolysis, gluconeogenesis, pyruvate metabolism	103192-55-8;	2042.7	387.2
588			glucose 1-phosphate	GC/MS	33755	C00103	HMDB01586	0.3	2.99	1.73	0.07	0.41		< 0.001	2.63734e-05	100	Carbohydrate	Glycolysis, gluconeogenesis, pyruvate metabolism	56401-20-8;	1853	217.1
589			glucose	GC/MS	38507	C00031	HMDB00122	2.44	7.09	205.44	9.07	0.13		0.176431	0.0644993	100	Carbohydrate	Glycolysis, gluconeogenesis, pyruvate metabolism	50-99-7;	1866.8	204.1
592			fructose-6-phosphate	GC/MS	12021	C05345	HMDB00124	0.56	2.14	2.95	0.11	0.14		0.0319799	0.0150287	100	Carbohydrate	Glycolysis, gluconeogenesis, pyruvate metabolism	103213-47-4;	1994.9	315.1
595			Isobar: fructose 1,6-diphosphate, glucose 1,6-diphosphate, myo-inositol 1,4 or 1,3-diphosphate	LC/MS neg	36984			0.09	2.21	1.64	0.06	0.86		< 0.001	6.02625e-07	100	Carbohydrate	Glycolysis, gluconeogenesis, pyruvate metabolism		572	339
596			2-phosphoglycerate	GC/MS	35629	C00631	HMDB03391	0.88	1.34	37.12	20.88	0.85		0.54498	0.164508	100	Carbohydrate	Glycolysis, gluconeogenesis, pyruvate metabolism	70195-25-4;	1734	459.1
597			3-phosphoglycerate	GC/MS	1414	C00597	HMDB00807	0.84	1.36	45.9	20.42	0.72		0.137077	0.0520075	100	Carbohydrate	Glycolysis, gluconeogenesis, pyruvate metabolism	80731-10-8;	1754	299
602			phosphoenolpyruvate (PEP)	GC/MS	597	C00074	HMDB00263	1	1.33	12.18	9.14	1		< 0.001	6.02625e-07	100	Carbohydrate	Glycolysis, gluconeogenesis, pyruvate metabolism	10526-80-4;	1595.4	369
603			pyruvate	GC/MS	599	C00022	HMDB00243	1.18	1.2	1.54	1.84	1.22		0.114383	0.0444161	100	Carbohydrate	Glycolysis, gluconeogenesis, pyruvate metabolism	127-17-3;	1130.6	217
604			lactate	GC/MS	527	C00186	HMDB00190	1.02	0.8	0.4	0.35	0.7		0.798989	0.222506	100	Carbohydrate	Glycolysis, gluconeogenesis, pyruvate metabolism	79-33-4;	1102.8	116.9
613		Nucleotide sugars, pentose metabolism	6-phosphogluconate	LC/MS neg	15442	C00345	HMDB01316	1.85	0.95	2.68	0.63	0.12		< 0.001	0.000151004	100	Carbohydrate	Nucleotide sugars, pentose metabolism	921-62-0;53411-70-4;	588	275.1
614			arabitol	GC/MS	38075	C00474	HMDB01851	1.19	0.64	0.52	0.13	0.13		0.0292609	0.013909	83.3333	Carbohydrate	Nucleotide sugars, pentose metabolism	488-82-4;	1687.5	307.1
616			ribitol	GC/MS	15772	C00474	HMDB00508	1.17	1.34	1.84	0.79	0.49		0.0196593	0.00985467	100	Carbohydrate	Nucleotide sugars, pentose metabolism	488-81-3;	1692.4	217
619			sedoheptulose-7-phosphate	GC/MS	35649	C05382	HMDB01068	0.8	1.17	1.34	0.27	0.3		0.186107	0.0663488	83.3333	Carbohydrate	Nucleotide sugars, pentose metabolism	2646-35-7;	2070	691.35
622			ribose	GC/MS	12083	C00121	HMDB00283	0.54	2.42	7.34	0.92	0.56		0.00344207	0.00222864	100	Carbohydrate	Nucleotide sugars, pentose metabolism	50-69-1;	1652	204
629			Isobar: ribulose 5-phosphate, xylulose 5-phosphate	GC/MS	37288			0.72	2.24	9.4	0.69	0.23		0.0701811	0.029921	100	Carbohydrate	Nucleotide sugars, pentose metabolism		1935	357.2
630			UDP-glucose	GC/MS	32344	C00029	HMDB00286	0.86	1.07	0.6	0.24	0.51		0.179527	0.0648411	100	Carbohydrate	Nucleotide sugars, pentose metabolism	117756-22-6;	1986	243.1
631			UDP-glucuronate	LC/MS neg	2763	C00167	HMDB00935	0.41	1.66	0.37	0.08	0.85		< 0.001	8.22356e-08	66.6667	Carbohydrate	Nucleotide sugars, pentose metabolism	28053-08-9;63700-19-6;	594	579.1
633			xylitol	GC/MS	41319	C00379	HMDB00568	1.31	1.15	1.54	0.33	0.19		0.0134761	0.00716819	100	Carbohydrate	Nucleotide sugars, pentose metabolism	87-99-0;	1677.6	217
637			xylose	GC/MS	15835	C00181	HMDB00098	2.74	1	1	0.89	0.32		< 0.001	4.02264e-07	0	Carbohydrate	Nucleotide sugars, pentose metabolism	609-06-3;	1723.9	204
638			xylonate	GC/MS	35638	C00502,C05411		6.29	1	1	0.81	0.13		< 0.001	3.28096e-07	0	Carbohydrate	Nucleotide sugars, pentose metabolism	73686-31-7;	1722	292
648	Energy	Krebs cycle	citrate	GC/MS	1564	C00158	HMDB00094	1.67	0.92	0.67	1.87	1.54		< 0.001	0.00025531	100	Energy	Krebs cycle	77-92-9;	1763.4	273.1
659			succinate	GC/MS	1437	C00042	HMDB00254	0.66	0.82	0.94	0.49	0.64		0.00293713	0.00197409	100	Energy	Krebs cycle	110-15-6;	1348	247
663			fumarate	GC/MS	1643	C00122	HMDB00134	0.79	0.73	0.49	0.59	1.12		0.177021	0.0644993	100	Energy	Krebs cycle	100-17-8;	1382.1	245
667			malate	GC/MS	1303	C00149	HMDB00156	0.7	0.52	0.4	0.67	1.22		0.00190586	0.00137564	100	Energy	Krebs cycle	6915-15-7;	1502	233
670		Oxidative phosphorylation	acetylphosphate	GC/MS	15488	C00227	HMDB01494	1.27	0.92	0.9	1.06	0.86		0.00449063	0.00275125	100	Energy	Oxidative phosphorylation	94249-01-1;	1263	211
671			phosphate	GC/MS	11438	C00009	HMDB01429	1.05	1.23	1.02	0.98	1.13		0.415129	0.132896	100	Energy	Oxidative phosphorylation	7664-38-2 ;	1307.7	298.9
672			pyrophosphate (PPi)	GC/MS	2078	C00013	HMDB00250	2.17	0.55	0.66	1.27	0.49		0.00779226	0.00444155	100	Energy	Oxidative phosphorylation	1466-09-3;	1642.3	451
673	Lipid	Essential fatty acid	linoleate (18:2n6)	LC/MS neg	1105	C01595	HMDB00673	0.64	0.89	1.86	1.46	1.09		0.0224872	0.0110709	100	Lipid	Essential fatty acid	60-33-3;	5533	279.3
677			linolenate [alpha or gamma; (18:3n3 or 6)]	LC/MS neg	34035	C06427	HMDB01388	0.5	0.79	1.92	1.4	1.15		0.00144209	0.00115314	100	Lipid	Essential fatty acid		5450	277.3
679			eicosapentaenoate (EPA; 20:5n3)	LC/MS neg	18467	C06428	HMDB01999	1.46	2.26	6.02	3.09	0.8		0.00216592	0.00150541	100	Lipid	Essential fatty acid	10-2005-9;10417-94-4;	5442	301.3
680			docosapentaenoate (n3 DPA; 22:5n3)	LC/MS neg	32504	C16513	HMDB01976	0.74	2.3	3.78	1.04	0.85		0.0863225	0.0348279	100	Lipid	Essential fatty acid	2234-74-4 ;	5574	329.4
681			docosapentaenoate (n6 DPA; 22:5n6)	LC/MS neg	37478	C06429	HMDB13123	0.63	1.06	1.17	0.14	0.2		0.0924332	0.0367555	100	Lipid	Essential fatty acid	25182-74-5;	5625	329.4
682			docosahexaenoate (DHA; 22:6n3)	LC/MS neg	19323	C06429	HMDB02183	0.91	1.19	1.45	2.17	1.96		0.508432	0.155175	100	Lipid	Essential fatty acid	6217-54-5;	5518	327.3
687		Medium chain fatty acid	caproate (6:0)	LC/MS neg	32489	C01585	HMDB00535	0.97	1.71	2.2	0.54	0.43		0.550935	0.165701	66.6667	Lipid	Medium chain fatty acid	142-62-1;	2766	115.2
689			caprylate (8:0)	LC/MS neg	32492	C06423	HMDB00482	0.84	1.32	0.93	0.92	1.55		0.416155	0.132896	50	Lipid	Medium chain fatty acid	124-07-2;	4367	143.2
690			pelargonate (9:0)	LC/MS neg	12035	C01601	HMDB00847	1.01	1.3	1.03	0.98	1.22		0.893725	0.24236	100	Lipid	Medium chain fatty acid	112-05-0;	4847	157.2
691			caprate (10:0)	LC/MS neg	1642	C01571	HMDB00511	0.99	1.17	1.05	1	1.13		0.884618	0.24068	100	Lipid	Medium chain fatty acid	112-37-8;	5092	171.2
694			laurate (12:0)	LC/MS neg	1645	C02679	HMDB00638	0.99	1.42	1.15	0.91	1.13		0.730759	0.20699	100	Lipid	Medium chain fatty acid	143-07-7;	5288	199.3
698		Long chain fatty acid	myristate (14:0)	GC/MS	1365	C06424	HMDB00806	0.96	1.21	1.3	1.19	1.15		0.556097	0.166648	100	Lipid	Long chain fatty acid	544-63-8;	1789.7	285.2
700			pentadecanoate (15:0)	GC/MS	1361	C16537	HMDB00826	1.1	1.61	2.04	1.09	0.78		0.439431	0.139254	100	Lipid	Long chain fatty acid	1002-84-2;	1853.5	299.2
701			palmitate (16:0)	GC/MS	1336	C00249	HMDB00220	0.92	1.45	1.66	1.02	0.97		0.343808	0.112843	100	Lipid	Long chain fatty acid	57-10-3;	1905.4	313.2
702			palmitoleate (16:1n7)	GC/MS	1507	C08362	HMDB03229	1.1	0.84	1.02	1.71	1.29		0.49035	0.151898	100	Lipid	Long chain fatty acid	373-49-9;	1895.6	311.2
704			margarate (17:0)	LC/MS neg	1121		HMDB02259	0.68	3.66	4.16	0.61	0.79		0.20567	0.0708789	100	Lipid	Long chain fatty acid	506-12-7;	5733	269.3
705			10-heptadecenoate (17:1n7)	LC/MS neg	33971			0.69	1.57	3.15	1.35	0.98		0.0464783	0.0206678	100	Lipid	Long chain fatty acid	29743-97-3;	5558	267.3
706			stearate (18:0)	LC/MS neg	1358	C01530	HMDB00827	0.85	1.89	1.86	0.79	0.95		0.498841	0.152811	100	Lipid	Long chain fatty acid	57-11-4;	5886	283.4
708			oleate (18:1n9)	GC/MS	1359	C00712	HMDB00207	0.88	1.16	1.29	1.09	1.12		0.126114	0.0482912	100	Lipid	Long chain fatty acid	112-80-1;	1984.4	339.2
710			cis-vaccenate (18:1n7)	GC/MS	33970	C08367		1.02	1.06	1.16	1.03	0.93		0.770177	0.215936	100	Lipid	Long chain fatty acid	693-72-1;	1987	339.3
717			10-nonadecenoate (19:1n9)	LC/MS neg	33972			0.48	0.85	1.22	1.58	2.32		0.00784026	0.00444155	100	Lipid	Long chain fatty acid	73033-09-7;	5775	295.4
722			eicosenoate (20:1n9 or 11)	LC/MS neg	33587		HMDB02231	0.61	0.93	1.01	1.35	2.02		0.0383921	0.0175437	100	Lipid	Long chain fatty acid		5955	309.4
724			dihomo-linoleate (20:2n6)	LC/MS neg	17805	C16525		0.41	0.51	1.31	2.72	2.55		0.00229222	0.00156685	100	Lipid	Long chain fatty acid	2091-39-6;	5722	307.3
727			mead acid (20:3n9)	LC/MS neg	35174		HMDB10378	0.46	0.53	1.25	10.45	9.55		0.0199132	0.00992178	100	Lipid	Long chain fatty acid	20590-32-3;	5642	305.4
728			arachidonate (20:4n6)	LC/MS neg	1110	C00219	HMDB01043	1.8	2.67	13.57	1.3	0.14		0.00303018	0.00199471	100	Lipid	Long chain fatty acid	506-32-1;	5525	303.4
733			docosadienoate (22:2n6)	LC/MS neg	32415	C16533		0.38	0.7	0.66	1.08	3.03		< 0.001	0.000754456	100	Lipid	Long chain fatty acid	7370-49-2 ;	6017	335.4
734			docosatrienoate (22:3n3)	LC/MS neg	32417	C16534	HMDB02823	0.32	0.37	0.74	2.52	4.02		0.00167457	0.00127068	100	Lipid	Long chain fatty acid	59708-86-0 ;	5825	333.4
735			adrenate (22:4n6)	LC/MS neg	32980	C16527	HMDB02226	0.47	1.62	2.6	0.16	0.21		0.00545034	0.00326664	100	Lipid	Long chain fatty acid	2091-25-0;	5684	331.3
737			lignocerate (24:0)	GC/MS	1364	C08320	HMDB02003	1.14	0.67	0.52	1.55	1.73		0.5112	0.155446	100	Lipid	Long chain fatty acid	557-59-5;	2211	425.4
759		Fatty acid, ester	n-Butyl Oleate	GC/MS	36802			0.82	1.84	1.59	0.92	1.3		0.151918	0.0568555	100	Lipid	Fatty acid, ester	142-77-8;	2045	265.3
762		Fatty acid, monohydroxy	4-hydroxybutyrate (GHB)	GC/MS	34585	C00989	HMDB00710	0.82	0.97	0.93	0.73	0.93		0.305025	0.101788	100	Lipid	Fatty acid, monohydroxy	502-85-2;	1277	233.1
774			2-hydroxystearate	LC/MS neg	17945	C03045		0.36	7.35	6.3	0.5	1.62		0.0127685	0.00694788	100	Lipid	Fatty acid, monohydroxy	629-22-1;	5705	299.4
776			2-hydroxypalmitate	LC/MS neg	35675			0.52	3.54	3.64	0.71	1.31		0.013959	0.00735378	100	Lipid	Fatty acid, monohydroxy	764-67-0;	5508	271.3
780			13-HODE + 9-HODE	LC/MS neg	37752			1.12	1.31	6.45	2.23	0.4		0.878319	0.239754	100	Lipid	Fatty acid, monohydroxy		5247	295.2
786		Fatty acid, dicarboxylate	2-hydroxyglutarate	GC/MS	37253	C02630	HMDB00606	2.69	0.7	1.29	0.09	0.02		< 0.001	1.99972e-06	100	Lipid	Fatty acid, dicarboxylate	40951-21-1;	1576	247
817		Fatty acid, branched	13-methylmyristic acid	LC/MS neg	38293			1.14	1.24	0.95	0.9	1.02		0.0130864	0.00706776	100	Lipid	Fatty acid, branched	2485-71-4;	5498	241.3
819			15-methylpalmitate (isobar with 2-methylpalmitate)	LC/MS neg	38768			0.9	1.43	1.28	1.02	1.25		0.220271	0.0752833	100	Lipid	Fatty acid, branched		5698	269.4
826		Eicosanoid	thromboxane B2	LC/MS neg	17807	C05963	HMDB03252	1	2.11	21.99	10.4	1				100	Lipid	Eicosanoid	54397-85-2;	4520	369.3
830			prostaglandin A2	LC/MS neg	19761	C05953	HMDB02752	1	0.69	1.12	1.62	1				66.6667	Lipid	Eicosanoid	13345-50-1;	4875	333.3
834			prostaglandin E2	LC/MS neg	7746	C00584	HMDB01220	0.6	0.5	25.92	82.74	2.68		0.0287666	0.013833	100	Lipid	Eicosanoid	363-24-6;	4562	351.3
865			6-keto prostaglandin F1alpha	LC/MS neg	20476	C05961	HMDB02886	0.88	3.61	5.02	1.22	1		0.179316	0.0648411	50	Lipid	Eicosanoid	58961-34-8;58962-34-8;	4180	369.3
870			5-HETE	LC/MS neg	37372			1	1.1	1.1	1	1				0	Lipid	Eicosanoid	73307-52-5;	5372	319.2
888		Fatty acid metabolism (also BCAA metabolism)	propionylcarnitine	LC/MS pos	32452	C03017	HMDB00824	2.14	0.43	0.18	0.46	0.5		< 0.001	1.14091e-05	100	Lipid	Fatty acid metabolism (also BCAA metabolism)	17298-37-2 ;	1589	218.2
890			butyrylcarnitine	LC/MS pos	32412			2.03	1.14	0.43	0.08	0.11		< 0.001	2.47947e-05	100	Lipid	Fatty acid metabolism (also BCAA metabolism)	25576-40-3;	2007	232.2
892		Fatty acid metabolism	valerylcarnitine	LC/MS pos	34406		HMDB13128	3.07	1.48	0.55	0.1	0.08		< 0.001	2.09969e-05	33.3333	Lipid	Fatty acid metabolism		2584	246.2
898		Carnitine metabolism	deoxycarnitine	LC/MS pos	36747	C01181	HMDB01161	1.19	0.63	0.36	0.46	0.68		< 0.001	9.4919e-05	100	Lipid	Carnitine metabolism	6249-56-5;	759	146.1
899			carnitine	LC/MS pos	15500			1.62	0.73	0.57	0.98	0.78		< 0.001	3.49477e-06	100	Lipid	Carnitine metabolism	461-05-2;	702	162.2
900			3-dehydrocarnitine*	LC/MS pos	32654	C02636	HMDB12154	2.59	1.01	0.6	0.26	0.17		< 0.001	3.34092e-06	100	Lipid	Carnitine metabolism	10457-99-5;	1020	160.2
901			acetylcarnitine	LC/MS pos	32198	C02571	HMDB00201	1.57	1.5	0.73	0.48	0.64		0.0011737	0.000961158	100	Lipid	Carnitine metabolism	5080-50-2;	1203	204.2
902			hexanoylcarnitine	LC/MS pos	32328	C01585	HMDB00705	4.02	3.63	0.6	0.03	0.05		< 0.001	7.54092e-07	33.3333	Lipid	Carnitine metabolism	6920-35-0;	3174	260.2
904			octanoylcarnitine	LC/MS pos	33936			8.3	1	0.5	0.26	0.06		< 0.001	8.22356e-08	0	Lipid	Carnitine metabolism	3671-77-0;	4100	288.3
912			palmitoylcarnitine	LC/MS pos	22189			1.71	3.2	1.37	0.19	0.26		0.14095	0.0532326	100	Lipid	Carnitine metabolism	6865-14-1;	5179	400.4
913			stearoylcarnitine	LC/MS pos	34409		HMDB00848	0.91	4.55	2.53	0.23	0.45		0.411885	0.132814	100	Lipid	Carnitine metabolism	18822-91-8;	5300	428.4
914			oleoylcarnitine	LC/MS pos	35160		HMDB05065	2.02	2.11	0.34	0.24	0.73		< 0.001	0.000149337	100	Lipid	Carnitine metabolism		5202	426.4
953		Fatty alcohol, long chain	1-octadecanol	GC/MS	21128	D01924	HMDB02350	1.14	1.23	1.17	1.05	0.96		0.19115	0.0678539	100	Lipid	Fatty alcohol, long chain	112-92-5;	1957.7	327.3
954		Glycerolipid metabolism	choline phosphate	LC/MS pos	34396			1.08	0.34	0.3	0.74	0.77		0.192618	0.068083	100	Lipid	Glycerolipid metabolism	72556-74-2;	695	184.1
955			ethanolamine	GC/MS	1497	C00189	HMDB00149	6.01	0.5	0.67	2	0.25		< 0.001	8.22356e-08	100	Lipid	Glycerolipid metabolism	141-43-5;	1304	174.1
956			phosphoethanolamine	GC/MS	12102	C00346	HMDB00224	7.89	0.94	4.08	7.47	0.22		< 0.001	9.6363e-06	100	Lipid	Glycerolipid metabolism	1071-23-4;	1577.3	299.1
959			glycerol	GC/MS	15122	C00116	HMDB00131	1.21	1.07	1.15	1	0.77		< 0.001	0.000590074	100	Lipid	Glycerolipid metabolism	56-81-5;	1311	205
960			choline	LC/MS pos	15506			1.71	0.87	0.8	0.91	0.58		< 0.001	4.54722e-06	100	Lipid	Glycerolipid metabolism	67-48-1;	674	104.2
961			glycerol 3-phosphate (G3P)	GC/MS	15365	C00093	HMDB00126	9.71	1.98	1.42	2.8	0.4		< 0.001	6.79622e-06	100	Lipid	Glycerolipid metabolism	29849-82-9;	1719.7	357.1
962			glycerophosphorylcholine (GPC)	LC/MS pos	15990	C00670	HMDB00086	5.62	2.65	1.19	2.45	0.97		< 0.001	1.05727e-05	100	Lipid	Glycerolipid metabolism	28319-77-9;	694	258.1
965			cytidine 5'-diphosphocholine	LC/MS pos	34418			0.73	0.61	0.21	0.28	1.12		< 0.001	6.45574e-05	100	Lipid	Glycerolipid metabolism	33818-15-4;	777	489.1
971		Inositol metabolism	myo-inositol	GC/MS	19934	C00137	HMDB00211	0.89	1.69	1.21	0.01	0.01		0.121053	0.0465686	100	Lipid	Inositol metabolism	87-89-8;	1924.9	217
974			inositol 1-phosphate (I1P)	GC/MS	1481		HMDB00213	1.37	1.02	0.9	1.38	1.14		0.00295959	0.00197409	100	Lipid	Inositol metabolism	106032-59-1;	2057.8	318.1
979			scyllo-inositol	GC/MS	32379	C06153	HMDB06088	0.73	2.13	2.13	0.01	0.01		< 0.001	0.000540247	66.6667	Lipid	Inositol metabolism	488-59-5;	1893.8	318.2
990		Lysolipid	1-palmitoylglycerophosphoethanolamine	LC/MS neg	35631		HMDB11503	0.67	3.51	10.41	1.29	0.65		0.986903	0.260788	100	Lipid	Lysolipid		5940	452.3
991			2-palmitoylglycerophosphoethanolamine*	LC/MS pos	35684			0.43	3.19	2.1	0.45	1.57		0.01352	0.00716819	100	Lipid	Lysolipid		5598	454.2
993			2-palmitoleoylglycerophosphoethanolamine*	LC/MS pos	34871			1.05	1.63	0.98	1.11	1.76		0.479887	0.149216	100	Lipid	Lysolipid		5487	452.1
995			1-stearoylglycerophosphoethanolamine	LC/MS pos	34416		HMDB11130	1.22	1.65	2.06	0.92	0.6		0.159166	0.0587705	100	Lipid	Lysolipid	69747-55-3;	5842	482.3
996			1-oleoylglycerophosphoethanolamine	LC/MS neg	35628		HMDB11506	0.9	2.92	7.75	1.32	0.55		0.670982	0.195003	100	Lipid	Lysolipid		5928	478.3
997			2-oleoylglycerophosphoethanolamine*	LC/MS neg	35687			1.06	2.87	4.86	1.12	0.62		0.478997	0.149216	100	Lipid	Lysolipid		5848	478.3
999			2-linoleoylglycerophosphoethanolamine*	LC/MS pos	34666			0.88	2.06	1	0.64	1.49		0.999771	0.263347	100	Lipid	Lysolipid		5541	478.3
1000			1-arachidonoylglycerophosphoethanolamine*	LC/MS neg	35186		HMDB11517	0.89	4.53	4.97	0.72	0.74		0.932304	0.25036	100	Lipid	Lysolipid		5731	500.3
1001			2-arachidonoylglycerophosphoethanolamine*	LC/MS pos	34656			0.85	2.89	1.9	0.48	0.86		0.821451	0.226474	100	Lipid	Lysolipid		5525	502.3
1003			2-docosapentaenoylglycerophosphoethanolamine*	LC/MS pos	34875			0.44	3.14	1.46	0.26	1.29		0.0648337	0.0282231	100	Lipid	Lysolipid		5548	528.2
1004			2-docosahexaenoylglycerophosphoethanolamine*	LC/MS pos	34258			0.6	1.66	1.03	0.96	2.59		0.370709	0.120714	100	Lipid	Lysolipid		5512	526.2
1007			1-myristoylglycerophosphocholine	LC/MS pos	35626		HMDB10379	0.69	2.76	2.48	0.91	1.47		0.668312	0.195003	100	Lipid	Lysolipid	20559-16-4;	5481	468.3
1008			2-myristoylglycerophosphocholine*	LC/MS pos	35681			0.59	1.65	1.11	1.44	3.59		0.246526	0.0836243	100	Lipid	Lysolipid		5450	468.3
1009			1-pentadecanoylglycerophosphocholine*	LC/MS pos	37418			0.75	4.73	4.58	0.61	0.84		0.633637	0.186505	83.3333	Lipid	Lysolipid		5563	482.3
1010			1-palmitoylglycerophosphocholine	LC/MS pos	33955			0.83	2.53	2.65	1.2	1.38		0.728857	0.20699	100	Lipid	Lysolipid	17364-16-8;	5671	496.4
1011			2-palmitoylglycerophosphocholine*	LC/MS pos	35253			0.56	3.5	2.41	0.55	1.43		0.0761266	0.0313255	100	Lipid	Lysolipid		5604	496.3
1012			1-palmitoleoylglycerophosphocholine*	LC/MS pos	33230			0.63	3.41	2.62	0.62	1.27		0.47629	0.149216	100	Lipid	Lysolipid		5524	494.3
1013			2-palmitoleoylglycerophosphocholine*	LC/MS pos	35819			0.78	2.45	1.38	1.51	3.45		0.727367	0.20699	100	Lipid	Lysolipid		5482	494.3
1014			1-heptadecanoylglycerophosphocholine	LC/MS pos	33957		HMDB12108	0.83	5.12	5.97	0.66	0.69		0.7275	0.20699	100	Lipid	Lysolipid	50930-23-9;	5750	510.4
1015			1-stearoylglycerophosphocholine	LC/MS pos	33961			1.13	2.59	3.22	0.76	0.55		0.290409	0.0976411	100	Lipid	Lysolipid	19420-57-6;	5844	524.4
1016			2-stearoylglycerophosphocholine*	LC/MS pos	35255			0.82	3.91	2.65	0.45	0.81		0.412685	0.132814	100	Lipid	Lysolipid		5780	524.4
1017			1-oleoylglycerophosphocholine	LC/MS pos	33960			0.68	3.18	2.72	0.8	1.36		0.493261	0.152032	100	Lipid	Lysolipid	19420-56-5;	5700	522.4
1018			2-oleoylglycerophosphocholine*	LC/MS pos	35254			0.73	2.16	1.36	0.79	1.72		0.460735	0.145448	100	Lipid	Lysolipid		5640	522.4
1019			1-linoleoylglycerophosphocholine	LC/MS pos	34419	C04100		0.54	3.44	2.21	0.44	1.24		0.109401	0.0428323	83.3333	Lipid	Lysolipid		5574	520.4
1020			2-linoleoylglycerophosphocholine*	LC/MS pos	35257			0.49	5.83	2.23	0.29	1.56		0.200217	0.0698731	100	Lipid	Lysolipid		5544	520.4
1024			2-eicosatrienoylglycerophosphocholine*	LC/MS pos	35884			0.65	4.95	2.67	0.72	2.07		0.131232	0.0500192	100	Lipid	Lysolipid		5565	546.3
1026			2-arachidonoylglycerophosphocholine*	LC/MS pos	35256			0.7	13.92	6.89	0.3	0.86		0.688509	0.19842	100	Lipid	Lysolipid		5524	544.3
1028			2-docosapentaenoylglycerophosphocholine*	LC/MS pos	37366			0.37	8.1	4.14	0.54	2.88		0.0707246	0.0299407	100	Lipid	Lysolipid		5532	570.3
1030			2-docosahexaenoylglycerophosphocholine*	LC/MS pos	35883			0.37	5.47	2.71	0.89	4.86		0.0973735	0.0383512	100	Lipid	Lysolipid		5507	568.3
1032			1-palmitoylglycerophosphoinositol*	LC/MS neg	35305			1.38	1.87	8.01	5.1	0.86		0.0587997	0.0257618	100	Lipid	Lysolipid		5573	571.3
1035			1-stearoylglycerophosphoinositol	LC/MS neg	19324			6	2.36	7.77	4.82	0.24		< 0.001	8.72155e-07	100	Lipid	Lysolipid		5800	599.4
1037			1-oleoylglycerophosphoinositol*	LC/MS neg	36602			1	0.93	2.76	4.3	1.45				100	Lipid	Lysolipid		5577	597.4
1040			1-arachidonoylglycerophosphoinositol*	LC/MS neg	34214			0.48	1.03	4.35	4.44	2.19		0.0160981	0.0083217	100	Lipid	Lysolipid		5479	619.4
1041			2-arachidonoylglycerophosphoinositol*	LC/MS neg	38077			0.61	0.81	4.32	4.65	1.42		0.0659633	0.0285645	100	Lipid	Lysolipid		5456	619.3
1045			1-palmitoylplasmenylethanolamine*	LC/MS neg	39270			1.15	2.89	7.57	1.44	0.48		0.2608	0.0880437	100	Lipid	Lysolipid		6153	436.4
1051		Monoacylglycerol	1-palmitoylglycerol (1-monopalmitin)	GC/MS	21127			1.53	1.08	1.58	1.61	0.73		< 0.001	0.000199297	100	Lipid	Monoacylglycerol	542-44-9;	2119.5	371.3
1053			1-stearoylglycerol (1-monostearin)	GC/MS	21188	D01947		1.6	1.41	2.05	1.22	0.52		< 0.001	0.000613542	100	Lipid	Monoacylglycerol	123-94-4;	2186.6	399.4
1055			1-oleoylglycerol (1-monoolein)	GC/MS	21184		HMDB11567	1.56	1	1.07	2	1.2		< 0.001	0.000583875	100	Lipid	Monoacylglycerol	111-03-5;	2181.2	397.4
1070		Diacylglycerol	1,2-dipalmitoylglycerol	GC/MS	35727		HMDB07098	0.68	0.82	1.53	1.37	1.07		0.199993	0.0698731	100	Lipid	Diacylglycerol	40290-32-2;	2638.5	313.3
1071			1,3-dipalmitoylglycerol	GC/MS	35728			0.95	1.49	2.76	0.98	0.56		0.745092	0.209614	83.3333	Lipid	Diacylglycerol	26657-95-4 ;	2637	371.3
1074		Sphingolipid	sphinganine	LC/MS pos	17769	C00836	HMDB00269	0.47	0.53	0.48	0.92	2.17		< 0.001	5.43726e-05	100	Lipid	Sphingolipid	3102-56-5;	5175	302.3
1077			sphingosine	LC/MS pos	17747	C00319	HMDB00252	1.6	0.5	0.54	4.89	2.85		< 0.001	0.000241489	100	Lipid	Sphingolipid	123-78-4;	5197	300.2
1081			N,N-dimethylsphingosine	LC/MS pos	32460	C13914		1	1.01	1.01	1	1				0	Lipid	Sphingolipid	119567-63-4;	5192	328.3
1086			palmitoyl sphingomyelin	GC/MS	37506			1.89	1.06	1.46	1.97	0.75		< 0.001	2.48009e-06	100	Lipid	Sphingolipid		2524	311.3
1087			stearoyl sphingomyelin	GC/MS	19503	C00550	HMDB01348	1.87	2.01	2.81	3.07	1.17		< 0.001	7.53731e-06	100	Lipid	Sphingolipid	85187-10-6;85187-10-6 ;	2645	311.3
1102		Sterol/Steroid	cholesterol	GC/MS	63	C00187	HMDB00067	1.12	1.32	1.48	1.32	1.06		0.0818415	0.0331818	100	Lipid	Sterol/Steroid	57-88-5;	2316.9	329.3
1104			dihydrocholesterol	GC/MS	21131		HMDB00908	1.19	1.46	1.58	1.19	0.92		0.185343	0.0663488	100	Lipid	Sterol/Steroid	80-97-7;	2320.8	215.2
1105			7-alpha-hydroxycholesterol	GC/MS	35692	C03594	HMDB01496	0.47	2.56	4.62	1.13	1.33		0.0059555	0.00354373	100	Lipid	Sterol/Steroid	566-27-8;	2300	456.2
1106			7-beta-hydroxycholesterol	GC/MS	35092	C03594	HMDB06119	0.78	2.76	4.05	1.12	0.98		0.00627624	0.00368161	100	Lipid	Sterol/Steroid	566-27-8;	2340	456.4
1187	Nucleotide	Purine metabolism, (hypo)xanthine/inosine containing	xanthine	GC/MS	3147	C00385	HMDB00292	1.57	12.33	12.33	0.68	0.44		0.0749596	0.0313126	0	Nucleotide	Purine metabolism, (hypo)xanthine/inosine containing	69-89-6;	1889.9	353
1190			hypoxanthine	LC/MS neg	3127	C00262	HMDB00157	2.13	0.7	0.93	2.83	1		< 0.001	0.000143759	100	Nucleotide	Purine metabolism, (hypo)xanthine/inosine containing	68-94-0;	1313	135.1
1192			inosine	LC/MS neg	1123			1.44	0.71	0.73	2.07	1.39		0.0748691	0.0313126	100	Nucleotide	Purine metabolism, (hypo)xanthine/inosine containing	58-63-9;	1630	267.2
1198		Purine metabolism, adenine containing	adenine	GC/MS	554	C00147	HMDB00034	0.62	0.39	0.27	0.31	0.72		< 0.001	0.000801396	100	Nucleotide	Purine metabolism, adenine containing	73-24-5;	1804.2	264
1199			adenosine	LC/MS pos	555	C00212	HMDB00050	0.66	0.87	0.47	1.01	2.8		0.0334477	0.0156297	100	Nucleotide	Purine metabolism, adenine containing	58-61-7;	1650	268.1
1201			N1-methyladenosine	LC/MS pos	15650	C02494	HMDB03331	1.64	0.33	0.24	1.93	1.62		0.115895	0.0447927	100	Nucleotide	Purine metabolism, adenine containing	15763-06-1;	1356	282.1
1206			adenosine 2'-monophosphate (2'-AMP)	LC/MS neg	36815	C00946	HMDB11617	0.53	2.54	2.61	0.4	0.73		0.0240107	0.0116927	83.3333	Nucleotide	Purine metabolism, adenine containing	130-49-4;	1497	346.1
1207			adenosine 3'-monophosphate (3'-AMP)	LC/MS neg	35142	C01367	HMDB03540	0.79	4.28	2.95	0.25	0.45		0.0359536	0.0165207	33.3333	Nucleotide	Purine metabolism, adenine containing	84-21-9;	1268	346.1
1208			adenosine 5'-monophosphate (AMP)	LC/MS pos	32342	C00020	HMDB00045	0.23	2.78	0.2	0.03	1.98		< 0.001	1.48353e-07	100	Nucleotide	Purine metabolism, adenine containing	149022-20-8;	1210	348.1
1210			adenosine 5'-diphosphate (ADP)	LC/MS neg	3108	C00008	HMDB01341	0.16	3.5	0.35	0.03	2.13		< 0.001	9.58769e-07	16.6667	Nucleotide	Purine metabolism, adenine containing	20398-34-9;	800	426.1
1215			adenosine 3',5'-cyclic monophosphate (cAMP)	LC/MS neg	2831	C00575	HMDB00058	0.76	1.19	1.01	1	1.56		0.00530675	0.0032038	100	Nucleotide	Purine metabolism, adenine containing	60-92-4;	1979	328.1
1220		Purine metabolism, guanine containing	guanine	LC/MS pos	32352	C00242	HMDB00132	2.56	0.59	1.28	6.95	1.25		< 0.001	4.01037e-07	100	Nucleotide	Purine metabolism, guanine containing	73-40-5;	1022	152.1
1224			guanosine	LC/MS neg	1573	C00387	HMDB00133	1.79	0.5	1.02	5.45	1.5		0.0143753	0.0075252	100	Nucleotide	Purine metabolism, guanine containing	118-00-3;	1675	282.1
1227			guanosine 5'- monophosphate (5'-GMP)	LC/MS pos	2849			0.18	2.64	0.12	0.04	4.15		< 0.001	3.28096e-07	50	Nucleotide	Purine metabolism, guanine containing	5550-12-9;	1300	364
1233			guanosine 5'-diphospho-fucose	LC/MS neg	15903			0.85	0.87	0.84	1.1	1.34		0.0389798	0.0176176	100	Nucleotide	Purine metabolism, guanine containing	15839-70-0;	797	588.1
1242			N6-carbamoylthreonyladenosine	LC/MS pos	35157			0.89	0.62	0.57	0.53	0.65		0.323232	0.106938	100	Nucleotide	Purine metabolism, guanine containing	24719-82-2;	2656	413
1247		Purine metabolism, urate metabolism	urate	GC/MS	1604	C00366	HMDB00289	0.61	1	1	0.61	1		0.0190518	0.00960836	0	Nucleotide	Purine metabolism, urate metabolism	69-93-2;120K5305;	1928	441.2
1248			allantoin	GC/MS	1107	C02350	HMDB00462	0.65	1.51	0.91	0.07	0.16		0.00191963	0.00137564	83.3333	Nucleotide	Purine metabolism, urate metabolism	97-59-6;	1809.8	518.3
1251		Pyrimidine metabolism, cytidine containing	cytidine	LC/MS pos	514	C00475	HMDB00089	3.36	0.03	0.18	11.04	0.59		< 0.001	0.000103438	100	Nucleotide	Pyrimidine metabolism, cytidine containing	65-46-3;	1065	244
1255			cytidine 5'-monophosphate (5'-CMP)	LC/MS pos	2372	C00055	HMDB00095	0.91	0.64	0.41	0.62	1.06		0.035695	0.0164935	100	Nucleotide	Pyrimidine metabolism, cytidine containing	63-37-6;	887	324
1277		Pyrimidine metabolism, uracil containing	uracil	GC/MS	605	C00106	HMDB00300	5.6	0.86	2.47	134.92	8.33		< 0.001	1.16677e-06	100	Nucleotide	Pyrimidine metabolism, uracil containing	66-22-8;	1370.4	241
1279			uridine	LC/MS neg	606	C00299	HMDB00296	1.63	0.53	1.46	2.81	0.62		0.00169595	0.0012752	100	Nucleotide	Pyrimidine metabolism, uracil containing	58-96-8;	1467	243.1
1280			pseudouridine	LC/MS neg	33442	C02067	HMDB00767	0.58	0.8	0.56	1.05	2.56		0.0217421	0.0107682	100	Nucleotide	Pyrimidine metabolism, uracil containing	1445-07-4;	1104	243.1
1287			uridine monophosphate (5' or 3')	LC/MS pos	39879			0.59	1	0.91	0.59	1.1		< 0.001	0.000369181	0	Nucleotide	Pyrimidine metabolism, uracil containing		1079	325
1289			uridine 5'-diphosphate (UDP)	LC/MS neg	5345	C00015	HMDB00295	0.23	6.63	0.22	0.01	2.04		< 0.001	6.71867e-05	50	Nucleotide	Pyrimidine metabolism, uracil containing	21931-53-3;	606	403
1290			uridine 5'-triphosphate (UTP)	LC/MS neg	33448	C00075	HMDB00285	0.56	6.73	0.37	0.03	0.95		< 0.001	0.000540247	66.6667	Nucleotide	Pyrimidine metabolism, uracil containing	19817-92-6;	639	483
1294		Purine and pyrimidine metabolism	methylphosphate	GC/MS	37070			0.86	1.02	0.99	0.64	0.77		0.00880502	0.00488766	100	Nucleotide	Purine and pyrimidine metabolism	7023-27-0;	1221	240.9
1297	Cofactors and vitamins	Ascorbate and aldarate metabolism	gulono-1,4-lactone	GC/MS	33454	C01040	HMDB03466	0.58	0.32	0.46	0.11	0.14		< 0.001	0.000516796	100	Cofactors and vitamins	Ascorbate and aldarate metabolism	1128-23-0;	1862	333.1
1307		Folate metabolism	5-methyltetrahydrofolate (5MeTHF)	LC/MS neg	18330	C00440	HMDB01396	0.61	0.8	0.57	0.29	0.67		< 0.001	0.000291243	100	Cofactors and vitamins	Folate metabolism	68703-91-3;68792-52-9;	1838	458.2
1324		Nicotinate and nicotinamide metabolism	nicotinamide	LC/MS pos	594	C00153	HMDB01406	0.61	0.78	0.65	0.43	0.84		0.00146391	0.00115314	100	Cofactors and vitamins	Nicotinate and nicotinamide metabolism	98-92-0;	1267	123.1
1327			nicotinamide adenine dinucleotide (NAD+)	LC/MS pos	5278	C00003	HMDB00902	1.36	0.88	0.77	0.84	0.7		< 0.001	1.54788e-06	100	Cofactors and vitamins	Nicotinate and nicotinamide metabolism	53-84-9;	1370	664
1328			nicotinamide adenine dinucleotide reduced (NADH)	LC/MS neg	31475	C00004	HMDB01487	1.26	1.46	0.6	0.14	0.26		0.433448	0.137886	100	Cofactors and vitamins	Nicotinate and nicotinamide metabolism	58-68-4 ;606-68-8;	1554	664.1
1330			nicotinamide adenine dinucleotide phosphate (NADP+)	LC/MS pos	32380	C00005	HMDB00217	0.34	0.38	0.32	2.33	8.18		< 0.001	2.24565e-07	100	Cofactors and vitamins	Nicotinate and nicotinamide metabolism	53-59-8 ;1184-16-3;	1330	743.9
1334			nicotinamide riboside*	LC/MS pos	33013			1.71	0.9	2.38	2.63	0.59		0.026361	0.0127504	66.6667	Cofactors and vitamins	Nicotinate and nicotinamide metabolism	1341-23-7;	955	255.1
1335			adenosine 5'diphosphoribose	LC/MS neg	558	C00301	HMDB01178	0.31	0.91	0.76	0.08	0.32		< 0.001	0.000240353	100	Cofactors and vitamins	Nicotinate and nicotinamide metabolism	68414-18-6;	964	558.1
1343			1-methylnicotinamide	LC/MS pos	27665	C02918	HMDB00699	2.03	1.04	0.72	0.21	0.15		< 0.001	1.43722e-06	100	Cofactors and vitamins	Nicotinate and nicotinamide metabolism	1005-24-9;	688	137.1
1347		Pantothenate and CoA metabolism	pantothenate	LC/MS pos	1508	C00864	HMDB00210	0.99	0.83	0.56	0.26	0.39		0.796268	0.222497	100	Cofactors and vitamins	Pantothenate and CoA metabolism	137-08-6;	2218	220.1
1349			phosphopantetheine	LC/MS neg	15504	C01134	HMDB01416	1.34	0.99	2.71	1.73	0.47		0.156324	0.05798	100	Cofactors and vitamins	Pantothenate and CoA metabolism	NA;	1624	357.2
1350			coenzyme A	LC/MS neg	2936	C00010	HMDB01423	0.2	0.24	0.4	2.74	8.21		< 0.001	6.02625e-07	100	Cofactors and vitamins	Pantothenate and CoA metabolism	85-61-0;18439-24-2;	1600	766.1
1351			3'-dephosphocoenzyme A	LC/MS neg	18289	C00882	HMDB01373	0.44	0.3	0.85	1.45	1.18		0.0174318	0.00895515	100	Cofactors and vitamins	Pantothenate and CoA metabolism	3633-59-8;	2010	686.2
1352			acetyl CoA	LC/MS neg	32484	C00024	HMDB01206	0.68	0.78	0.53	2.32	5.1		0.0305526	0.01444	100	Cofactors and vitamins	Pantothenate and CoA metabolism	102029-73-2;	1900	808.1
1364		Pyridoxal metabolism	pyridoxal	LC/MS pos	1651	C00250	HMDB01545	2.01	0.74	1.29	2.52	0.72		< 0.001	0.000301603	100	Cofactors and vitamins	Pyridoxal metabolism	65-22-5;	1210	168.1
1365		Riboflavin metabolism	flavin adenine dinucleotide (FAD)	LC/MS neg	2134	C00016	HMDB01248	0.76	1.21	1.19	1.87	2.5		0.00162645	0.00124559	100	Cofactors and vitamins	Riboflavin metabolism	146-14-5;84366-81-4;	2413	784.1
1366			riboflavin (Vitamin B2)	LC/MS pos	1827	C00255	HMDB00244	1.17	1.37	3.05	3.88	1.49		0.327994	0.108081	100	Cofactors and vitamins	Riboflavin metabolism	83-88-5;	3111	377.2
1368		Thiamine metabolism	thiamin (Vitamin B1)	LC/MS pos	5341			1.59	0.72	0.47	0.95	0.91		0.00674142	0.00392663	100	Cofactors and vitamins	Thiamine metabolism	59-43-8;	740	265.1
1372		Tocopherol metabolism	alpha-tocopherol	GC/MS	1561	C02477	HMDB01893	0.84	0.77	0.87	0.99	1.05		0.821312	0.226474	66.6667	Cofactors and vitamins	Tocopherol metabolism	59-02-9;10191-41-0;	2305.4	502.5
1395	Xenobiotics	Benzoate metabolism	hippurate	LC/MS neg	15753	C01586	HMDB00714	0.86	0.82	0.51	0.34	0.64		0.17134	0.0629846	33.3333	Xenobiotics	Benzoate metabolism	495-69-2;	2136	178.1
1430		Chemical	glycolate (hydroxyacetate)	GC/MS	15737	C00160	HMDB00115	0.89	1.22	1.03	0.9	1.2		0.608036	0.180901	83.3333	Xenobiotics	Chemical	79-14-1;	1119	177
1436			glycerol 2-phosphate	GC/MS	27728	C02979,D01488	HMDB02520	3.51	1.91	1.32	1.51	0.62		< 0.001	3.15975e-05	100	Xenobiotics	Chemical	819-83-0;	1691.8	243
1455			trizma acetate	GC/MS	20710	C07182		1	1.71	0.4	1.71	7.36				100	Xenobiotics	Chemical	6850-28-8;	1525	306.2
1457			methyl-alpha-glucopyranoside	GC/MS	20714	C04942,C02603		3.03	4.44	5.79	0.56	0.14		< 0.001	4.66538e-05	100	Xenobiotics	Chemical	97-30-3;	1809	204
1472			2-ethylhexanoate (isobar with 2-propylpentanoate)	LC/MS neg	35490			1.29	1.15	1.03	1.17	1.01		0.0411202	0.0184839	100	Xenobiotics	Chemical		3909	143.1
1488			phenol red	LC/MS neg	36817	C12600		1.79	0.63	0.89	1.64	0.65		< 0.001	2.56758e-05	100	Xenobiotics	Chemical	143-74-8;	3650	353.1
1593		Drug	penicillin G	LC/MS pos	37468	C05551		1	0.46	0.68	2.97	2.01				100	Xenobiotics	Drug	69-57-8;	3314	335.2
1617			streptomycin	LC/MS pos	39872			1	1.35	1.35	1	1				0	Xenobiotics	Drug	3810-74-0;	543.3	300.8
1818		Sugar, sugar substitute, starch	erythritol	GC/MS	20699	C00503	HMDB02994	0.79	1.21	0.99	0.12	0.19		0.00401946	0.00251855	100	Xenobiotics	Sugar, sugar substitute, starch	149-32-6;	1517.5	217
1824			galacturonate	GC/MS	20758	C08348	HMDB02545	1.04	0.94	1.84	0.44	0.22		0.470367	0.147924	100	Xenobiotics	Sugar, sugar substitute, starch	91510-62-2;	1888.7	204

## Sheet: ProNormImpData
											SAMPLE NAME	UPMC-00001	UPMC-00002	UPMC-00003	UPMC-00004	UPMC-00005	UPMC-00006	UPMC-00007	UPMC-00008	UPMC-00009	UPMC-00010	UPMC-00011	UPMC-00012
											CLIENT IDENTIFIER	1	2	3	4	5	6	7	8	9	10	11	12
											SAMPLE ID	1040412	1040396	1040388	1040394	1040390	1040403	1040406	1040413	1040421	1040404	1040409	1040398
											PARENT SAMPLE ID	1010734	1010735	1010736	1010737	1010738	1010739	1010740	1010741	1010742	1010743	1010744	1010745
											CELL TYPE	MYOBLAST	MYOBLAST	MYOBLAST	MYOBLAST	MYOBLAST	MYOBLAST	MYOBLAST	MYOBLAST	MYOBLAST	MYOBLAST	MYOBLAST	MYOBLAST
											GROUP	YOUNG	YOUNG	YOUNG	YOUNG	YOUNG	YOUNG	SENESCENT	SENESCENT	SENESCENT	SENESCENT	SENESCENT	SENESCENT
											CELL COUNT	8 millions	8 millions	8 millions	8 millions	8 millions	8 millions	5 millions	5 millions	5 millions	5 millions	5 millions	5 millions
											BRADFORD PROTEIN	16.25	15.829	16.507	16.391	15.461	16.762	16.419	15.216	15.159	15.652	14.315	15.282
PATHWAY SORTORDER	BIOCHEMICAL NAME	SUPER PATHWAY	SUB PATHWAY	COMP ID	PLATFORM	RI	MASS	CAS	PUBCHEM	KEGG	Group HMDB	MY	MY	MY	MY	MY	MY	MS	MS	MS	MS	MS	MS
1070	1,2-dipalmitoylglycerol	Lipid	Diacylglycerol	35727	GC/MS	2638.5	313.3	40290-32-2;	99931		HMDB07098	1.30037	1.28794	0.807726	0.352134	1.02058	1.02708	0.77117	0.521628	1.29686	0.979416	0.197133	0.197133
1071	1,3-dipalmitoylglycerol	Lipid	Diacylglycerol	35728	GC/MS	2637	371.3	26657-95-4 ;	68149			1.21407	0.536949	0.862564	0.886899	0.936508	1.27563	0.817894	1.17313	0.50482	1.26584	0.856531	0.78368
705	10-heptadecenoate (17:1n7)	Lipid	Long chain fatty acid	33971	LC/MS Neg	5558	267.3	29743-97-3;	5312435			0.759679	1.37286	1.41248	1.33879	1.62691	0.997615	0.815488	0.529932	0.686391	1.00239	0.83694	1.28468
717	10-nonadecenoate (19:1n9)	Lipid	Long chain fatty acid	33972	LC/MS Neg	5775	295.4	73033-09-7;	5312513			0.456853	0.937138	1.30017	1.06638	1.23063	0.637338	0.406182	0.296987	0.286289	0.456595	0.564311	0.670044
780	13-HODE + 9-HODE	Lipid	Fatty acid, monohydroxy	37752	LC/MS Neg	5247	295.2					0.883306	0.945304	0.994267	1.01438	1.02024	1.108	1.52598	0.669927	0.500369	1.00573	1.61956	1.38362
817	13-methylmyristic acid	Lipid	Fatty acid, branched	38293	LC/MS Neg	5498	241.3	2485-71-4;	151014			0.840416	1.00658	0.871991	1.02765	0.979837	0.850515	1.02803	1.01464	1.14173	1.07989	1.03524	1.0645
819	15-methylpalmitate (isobar with 2-methylpalmitate)	Lipid	Fatty acid, branched	38768	LC/MS Neg	5698	269.4					0.950475	0.980065	1.05331	1.00506	1.10627	0.777708	0.841499	0.798851	0.964714	0.909324	0.701681	1.09087
1000	1-arachidonoylglycerophosphoethanolamine*	Lipid	Lysolipid	35186	LC/MS Neg	5731	500.3				HMDB11517	0.92618	0.936973	2.21514	0.928429	1.88298	0.611543	0.945519	0.990197	1.15262	1.27116	1.10471	1.21523
1040	1-arachidonoylglycerophosphoinositol*	Lipid	Lysolipid	34214	LC/MS Neg	5479	619.4					0.292999	0.715175	1.02852	0.84569	0.886308	0.474211	0.292999	0.301205	0.292999	0.437774	0.416901	0.292999
1014	1-heptadecanoylglycerophosphocholine	Lipid	Lysolipid	33957	LC/MS Pos	5750	510.4	50930-23-9;			HMDB12108	2.07035	1.80443	2.62278	0.89018	0.8097	0.548517	0.754804	0.84628	1.21993	2.21206	1.26174	0.934206
1019	1-linoleoylglycerophosphocholine	Lipid	Lysolipid	34419	LC/MS Pos	5574	520.4		11988421	C04100		2.82097	1.76273	3.9376	1.15348	1.30938	0.738748	0.644476	1.01678	0.836688	2.29478	0.591494	1
1343	1-methylnicotinamide	Cofactors and vitamins	Nicotinate and nicotinamide metabolism	27665	LC/MS Pos	688	137.1	1005-24-9;		C02918	HMDB00699	2.85188	2.90785	2.80743	2.74653	2.88972	2.93522	5.73679	5.62665	5.4153	5.48695	6.6311	5.82196
1007	1-myristoylglycerophosphocholine	Lipid	Lysolipid	35626	LC/MS Pos	5481	468.3	20559-16-4;	460604		HMDB10379	1.78721	1.7082	2.82938	0.37397	0.416381	0.607617	0.448643	0.882797	1.03015	1.63307	0.577612	0.736045
953	1-octadecanol	Lipid	Fatty alcohol, long chain	21128	GC/MS	1957.7	327.3	112-92-5;	8221	D01924	HMDB02350	0.749188	1.1413	1.05565	0.753032	0.718736	0.976156	0.776808	0.969779	1.13247	1.09494	1.08545	1.10684
1055	1-oleoylglycerol (1-monoolein)	Lipid	Monoacylglycerol	21184	GC/MS	2181.2	397.4	111-03-5;	5283468		HMDB11567	0.653124	0.517454	0.806946	0.566466	0.772278	0.632538	0.842835	1.20385	0.988238	0.980812	1.20601	0.941281
1017	1-oleoylglycerophosphocholine	Lipid	Lysolipid	33960	LC/MS Pos	5700	522.4	19420-56-5;	16081932			1.93006	1.46814	3.15911	0.533294	0.650273	0.716261	0.638632	0.651767	1.03613	1.73354	0.86867	0.841532
996	1-oleoylglycerophosphoethanolamine	Lipid	Lysolipid	35628	LC/MS Neg	5928	478.3		9547071		HMDB11506	0.543619	0.566516	2.51076	0.511306	2.03837	0.666215	1.0213	1.03742	0.978701	0.972556	1.08557	1.08886
1037	1-oleoylglycerophosphoinositol*	Lipid	Lysolipid	36602	LC/MS Neg	5577	597.4					0.341941	0.341941	0.341941	0.341941	0.341941	0.341941	0.341941	0.341941	0.341941	0.341941	0.341941	0.341941
1012	1-palmitoleoylglycerophosphocholine*	Lipid	Lysolipid	33230	LC/MS Pos	5524	494.3					2.05814	2.27788	4.29389	0.72228	0.785949	0.5394	0.610766	1.10099	1.0115	2.26341	0.747277	0.97528
1051	1-palmitoylglycerol (1-monopalmitin)	Lipid	Monoacylglycerol	21127	GC/MS	2119.5	371.3	542-44-9;	14900			0.750968	0.831095	0.75115	0.675899	0.733209	0.793418	1.15978	1.0204	1.35712	1.31883	1.09285	0.979596
1010	1-palmitoylglycerophosphocholine	Lipid	Lysolipid	33955	LC/MS Pos	5671	496.4	17364-16-8;	86554			1.47913	1.25341	2.03045	0.529372	0.605625	0.662822	0.720511	0.68972	0.936155	1.46147	0.815474	0.838435
990	1-palmitoylglycerophosphoethanolamine	Lipid	Lysolipid	35631	LC/MS Neg	5940	452.3		9547069		HMDB11503	0.53008	0.528882	3.64554	0.524143	2.94532	0.560183	0.990858	0.891017	0.865084	1.02237	1.11713	0.973702
1032	1-palmitoylglycerophosphoinositol*	Lipid	Lysolipid	35305	LC/MS Neg	5573	571.3					0.511616	0.697784	0.94499	0.666755	0.913417	0.511616	0.699798	1.35316	0.966602	0.744729	1.1806	0.903839
1045	1-palmitoylplasmenylethanolamine*	Lipid	Lysolipid	39270	LC/MS Neg	6153	436.4					0.329807	0.587639	2.56236	0.427074	1.8632	0.509066	1.10871	0.956652	1.01282	1.39472	1.24266	1.51871
1009	1-pentadecanoylglycerophosphocholine*	Lipid	Lysolipid	37418	LC/MS Pos	5563	482.3					2.22445	1.83511	2.78729	0.791719	0.64099	0.486411	0.776035	1.35131	0.6195	2.10134	0.687824	1.05106
1053	1-stearoylglycerol (1-monostearin)	Lipid	Monoacylglycerol	21188	GC/MS	2186.6	399.4	123-94-4;	24699	D01947		0.918166	0.752851	0.934471	0.621956	0.832367	1.07604	1.27171	1.48724	1.42006	1.53444	1.35166	1.17478
1015	1-stearoylglycerophosphocholine	Lipid	Lysolipid	33961	LC/MS Pos	5844	524.4	19420-57-6;	497299			1.03285	0.967151	2.1434	0.747316	0.689806	1.08722	1.20987	1.28128	1.18663	1.35534	1.30708	1.18597
995	1-stearoylglycerophosphoethanolamine	Lipid	Lysolipid	34416	LC/MS Pos	5842	482.3	69747-55-3;	9547068		HMDB11130	0.963798	1.12383	2.18245	0.739662	0.82761	0.945346	1.41179	1.3695	1.11948	1.48036	1.3751	1.50424
1035	1-stearoylglycerophosphoinositol	Lipid	Lysolipid	19324	LC/MS Neg	5800	599.4					0.28497	0.404692	0.533227	0.330139	0.426187	0.273392	1.86275	1.94132	2.40408	2.99573	1.92035	2.38718
77	2-aminoadipate	Amino acid	Lysine metabolism	6146	GC/MS	1686.5	260.1	542-32-5;1118-90-7;	469	C00956	HMDB00510	0.80253	1.00657	0.995183	0.913431	1.0634	0.990333	0.835766	0.657336	0.734379	0.938918	1.00482	0.850019
278	2-aminobutyrate	Amino acid	Butanoate metabolism	1577	GC/MS	1215.7	130	1492-24-6;	4396916971251	C02261	HMDB00650	2.12572	2.19952	2.10479	1.72304	2.02889	1.91107	1.01406	0.611524	1.00088	1.20369	0.589735	0.642022
1026	2-arachidonoylglycerophosphocholine*	Lipid	Lysolipid	35256	LC/MS Pos	5524	544.3					2.41218	2.71721	4.98109	0.777606	0.867578	0.644068	0.683017	1.39898	1.60874	2.79681	1.10455	1.1297
1001	2-arachidonoylglycerophosphoethanolamine*	Lipid	Lysolipid	34656	LC/MS Pos	5525	502.3					1.77611	1.94497	3.1335	0.876231	0.836627	0.694288	0.775153	1.39743	1.41732	2.11049	1.01724	1.12908
1041	2-arachidonoylglycerophosphoinositol*	Lipid	Lysolipid	38077	LC/MS Neg	5456	619.3					0.734314	0.812722	1.55328	0.767858	1.90675	0.73227	0.606511	0.606511	0.812879	0.697998	0.669035	0.606511
1030	2-docosahexaenoylglycerophosphocholine*	Lipid	Lysolipid	35883	LC/MS Pos	5507	568.3					1.83589	1.26367	2.5723	0.358781	0.404562	0.417787	0.243287	0.364667	0.472064	0.646837	0.39785	0.408229
1004	2-docosahexaenoylglycerophosphoethanolamine*	Lipid	Lysolipid	34258	LC/MS Pos	5512	526.2					1.30044	1.39909	2.50803	0.443966	0.447027	0.43855	0.394304	0.698571	0.75972	1.04049	0.459985	0.559376
1028	2-docosapentaenoylglycerophosphocholine*	Lipid	Lysolipid	37366	LC/MS Pos	5532	570.3					2.19618	1.86739	4.20511	0.876832	0.580858	0.534645	0.477998	0.786104	0.621701	1.00693	0.339619	0.523293
1003	2-docosapentaenoylglycerophosphoethanolamine*	Lipid	Lysolipid	34875	LC/MS Pos	5548	528.2					3.1392	2.99956	5.21646	1.15898	1.22044	0.95476	0.670582	1.16783	1.04524	1.93996	0.685629	0.949544
1024	2-eicosatrienoylglycerophosphocholine*	Lipid	Lysolipid	35884	LC/MS Pos	5565	546.3					1.85283	1.24856	2.34525	0.6644	0.918037	0.975619	0.532532	0.888466	0.899643	1.32389	0.562828	0.955923
1472	2-ethylhexanoate (isobar with 2-propylpentanoate)	Xenobiotics	Chemical	35490	LC/MS Neg	3909	143.1					0.832752	0.958081	0.669865	0.959105	0.618828	0.886043	1.28247	1.08818	0.795187	1.25289	0.887464	1.04427
786	2-hydroxyglutarate	Lipid	Fatty acid, dicarboxylate	37253	GC/MS	1576	247	40951-21-1;	43	C02630	HMDB00606	7.93635	10.0586	11.7409	8.36172	10.6556	8.09841	24.4737	22.6565	22.8881	25.4115	32.1264	25.181
776	2-hydroxypalmitate	Lipid	Fatty acid, monohydroxy	35675	LC/MS Neg	5508	271.3	764-67-0;	92836			0.737489	1.12545	1.813	1.55867	2.02826	0.933006	0.781495	0.431282	0.494985	0.724224	0.895888	0.950617
774	2-hydroxystearate	Lipid	Fatty acid, monohydroxy	17945	LC/MS Neg	5705	299.4	629-22-1;	69417	C03045		0.757506	1.24289	3.25714	1.81205	3.25714	1.03868	0.681127	0.437143	0.477887	0.69311	0.928397	0.900817
1020	2-linoleoylglycerophosphocholine*	Lipid	Lysolipid	35257	LC/MS Pos	5544	520.4					2.95324	2.73609	5.82018	1.24713	1.04071	0.601567	0.539353	1.22684	1.18616	2.29255	0.800205	0.95929
999	2-linoleoylglycerophosphoethanolamine*	Lipid	Lysolipid	34666	LC/MS Pos	5541	478.3					1.25851	2.20198	2.81334	0.74778	0.739946	0.514158	0.762711	1.0635	0.980008	2.17848	1.01999	1.25502
212	2-methylbutyroylcarnitine	Amino acid	Valine, leucine and isoleucine metabolism	35431	LC/MS Pos	2439	246.1	31023-25-3;	6426901		HMDB00378	0.999046	1.15697	1.14537	1.12602	1.11619	1.00095	2.36197	2.28902	2.07902	2.41952	2.82348	2.11998
1008	2-myristoylglycerophosphocholine*	Lipid	Lysolipid	35681	LC/MS Pos	5450	468.3					1.13692	0.816411	1.49339	0.222681	0.469707	0.580289	0.297607	0.462588	0.682023	0.561721	0.368008	0.432241
1018	2-oleoylglycerophosphocholine*	Lipid	Lysolipid	35254	LC/MS Pos	5640	522.4					1.98946	1.34982	2.21951	0.516784	0.761194	0.754379	0.797113	0.726651	1.04915	1.4242	0.648916	0.904715
997	2-oleoylglycerophosphoethanolamine*	Lipid	Lysolipid	35687	LC/MS Neg	5848	478.3					0.678915	0.472653	2.28306	0.844094	1.94404	0.562267	1.52731	0.762205	1.35117	1.39575	0.99406	1.13817
1013	2-palmitoleoylglycerophosphocholine*	Lipid	Lysolipid	35819	LC/MS Pos	5482	494.3					0.98739	1.06749	1.49752	0.252395	0.313988	0.367935	0.240994	0.552871	0.823274	1.01261	0.39059	0.4745
993	2-palmitoleoylglycerophosphoethanolamine*	Lipid	Lysolipid	34871	LC/MS Pos	5487	452.1					1.10506	1.18497	2.37275	0.2835	0.417892	0.348048	0.65681	0.916985	1.19891	1.61343	0.5863	1.01341
1011	2-palmitoylglycerophosphocholine*	Lipid	Lysolipid	35253	LC/MS Pos	5604	496.3					2.21679	1.6755	3.03731	0.928097	0.974223	0.873283	0.580482	1.02578	0.923765	1.46464	0.649591	0.794676
991	2-palmitoylglycerophosphoethanolamine*	Lipid	Lysolipid	35684	LC/MS Pos	5598	454.2					2.33615	2.15511	3.54666	0.972175	1.23675	1.06747	0.618818	0.885135	0.867547	1.30096	0.502232	0.703018
596	2-phosphoglycerate	Carbohydrate	Glycolysis, gluconeogenesis, pyruvate metabolism	35629	GC/MS	1734	459.1	70195-25-4;		C00631	HMDB03391	0.174884	0.174884	0.357029	0.210749	0.300106	0.174884	0.231029	0.174884	0.211819	0.174884	0.19674	0.240779
1016	2-stearoylglycerophosphocholine*	Lipid	Lysolipid	35255	LC/MS Pos	5780	524.4		10208382			1.21945	1.18192	2.59373	1.19269	0.891256	0.985707	0.767806	1.22537	1.14845	1.38346	0.929042	1.1301
107	3-(4-hydroxyphenyl)lactate	Amino acid	Phenylalanine & tyrosine metabolism	32197	LC/MS Neg	1395	181.1	6482-98-0;	9378	C03672	HMDB00755	1.02588	1.20081	1.15467	1.09802	1.15681	1.06652	0.712761	0.649654	0.612472	0.632921	0.841984	1.05476
900	3-dehydrocarnitine*	Lipid	Carnitine metabolism	32654	LC/MS Pos	1020	160.2	10457-99-5;	6991982	C02636	HMDB12154	1.98592	2.18138	2.06561	2.01758	2.14041	2.29755	5.39648	4.82995	4.72882	5.72081	6.76673	5.44432
1351	3'-dephosphocoenzyme A	Cofactors and vitamins	Pantothenate and CoA metabolism	18289	LC/MS Neg	2010	686.2	3633-59-8;	444485	C00882	HMDB01373	0.527929	0.710612	1.38035	2.00695	0.987848	0.672165	0.461006	0.461006	0.461006	0.461006	0.461006	0.461006
202	3-hydroxyisobutyrate	Amino acid	Valine, leucine and isoleucine metabolism	1549	GC/MS	1205	177.11	2068-83-9;	11966314	C06001	HMDB00336	1.59119	0.356787	0.873858	1.37277	1.17014	0.356787	1.02011	0.356787	0.789204	0.981339	0.356787	1.00067
183	3-methyl-2-oxovalerate	Amino acid	Valine, leucine and isoleucine metabolism	15676	LC/MS Neg	2106	129.2	51829-07-3;	47	C00671	HMDB03736	0.683487	0.683487	0.683487	0.683487	0.683487	0.683487	1.49994	0.683487	2.22166	0.683487	0.683487	0.683487
597	3-phosphoglycerate	Carbohydrate	Glycolysis, gluconeogenesis, pyruvate metabolism	1414	GC/MS	1754	299	80731-10-8;		C00597	HMDB00807	0.990904	1.30947	1.00772	1.43285	0.925234	0.846037	0.897133	0.945151	1.0027	0.787316	0.867979	0.997301
291	4-acetamidobutanoate	Amino acid	Guanidino and acetamido metabolism	1558	LC/MS Pos	1724	146.1	3025-96-5;	18189	C02946	HMDB03681	0.224866	0.920707	1.27568	1.07929	1.15804	0.513975	0.224866	0.224866	0.224866	0.224866	0.224866	0.224866
290	4-guanidinobutanoate	Amino acid	Guanidino and acetamido metabolism	15681	LC/MS Pos	1085	146.1	463-003;463-00-3;	500	C01035	HMDB03464	1.89537	2.16188	1.5867	1.69882	1.81384	1.963	2.34847	2.06891	2.28258	2.70307	2.86056	2.37045
762	4-hydroxybutyrate (GHB)	Lipid	Fatty acid, monohydroxy	34585	GC/MS	1277	233.1	502-85-2;	10413	C00989	HMDB00710	1.32051	1.53336	1.52424	1.11364	1.36574	0.669179	1.3053	0.56565	0.956434	0.818281	1.55178	1.00014
203	4-methyl-2-oxopentanoate	Amino acid	Valine, leucine and isoleucine metabolism	22116	LC/MS Neg	2200	129.2	816-66-0;	70	C00233	HMDB00695	0.759428	0.759428	0.76181	0.919527	0.759428	0.759428	0.930034	0.759428	3.054	0.759428	0.759428	0.759428
262	5-aminovalerate	Amino acid	Urea cycle; arginine-, proline-, metabolism	18319	LC/MS Pos	860	118.1	660-88-8;	6992101138	C00431	HMDB03355	1.08117	0.923001	1.05462	1.44544	1.07943	0.951524	1.75644	1.58584	1.4042	1.73924	2.17976	1.49042
870	5-HETE	Lipid	Eicosanoid	37372	LC/MS Neg	5372	319.2	73307-52-5;	9862886			0.880571	0.880571	0.880571	0.880571	0.880571	0.880571	0.880571	0.880571	0.880571	0.880571	0.880571	0.880571
1307	5-methyltetrahydrofolate (5MeTHF)	Cofactors and vitamins	Folate metabolism	18330	LC/MS Neg	1838	458.2	68703-91-3;68792-52-9;	146	C00440	HMDB01396	2.02349	2.1743	1.9179	1.88672	2.02859	1.93116	1.18803	1.16647	0.984281	1.08806	1.55608	1.31133
281	5-methylthioadenosine (MTA)	Amino acid	Polyamine metabolism	1419	LC/MS Pos	2427	298.1	2457-80-9;	439176	C00170	HMDB01173	1.56059	1.55246	1.53494	1.51269	1.4055	1.58698	1.16523	1.01725	0.817427	0.981465	1.23691	1.03309
297	5-oxoproline	Amino acid	Glutathione metabolism	1494	LC/MS Neg	744	128.2	98-79-3;	7405	C01879	HMDB00267	0.904923	1.06891	1.22728	0.887497	1.04546	0.957807	1.06136	0.943393	0.878323	1.10313	1.42705	1.09211
865	6-keto prostaglandin F1alpha	Lipid	Eicosanoid	20476	LC/MS Neg	4180	369.3	58961-34-8;58962-34-8;	5280888	C05961	HMDB02886	0.928103	0.845648	0.623033	0.623033	0.623033	0.623033	0.623033	0.623033	0.623033	0.623033	0.623033	0.623033
613	6-phosphogluconate	Carbohydrate	Nucleotide sugars, pentose metabolism	15442	LC/MS Neg	588	275.1	921-62-0;53411-70-4;	91493	C00345	HMDB01316	1.09108	1.35751	1.19374	1.02282	1.21043	1.15777	2.24397	1.89684	1.63966	2.47497	2.05835	2.722
545	6'-sialyllactose	Carbohydrate	Fructose, mannose, galactose, starch, and sucrose metabolism	39795	GC/MS	2071.5	285.1	35890-39-2;		G00265	HMDB06569	1.6378	2.1231	1.77267	0.718724	1.81574	1.82652	5.32384	3.54973	4.88973	5.70675	6.3938	3.73744
1105	7-alpha-hydroxycholesterol	Lipid	Sterol/Steroid	35692	GC/MS	2300	456.2	566-27-8;	107722	C03594	HMDB01496	1.24442	0.886131	1.29635	1.01937	1.23011	1.188	0.588678	0.27449	0.306778	0.55204	0.980634	0.535412
1106	7-beta-hydroxycholesterol	Lipid	Sterol/Steroid	35092	GC/MS	2340	456.4	566-27-8;	473141	C03594	HMDB06119	0.988662	1.16226	1.20885	1.00411	1.18054	0.995886	0.924785	0.682345	1.00623	0.766157	0.914776	0.824433
1352	acetyl CoA	Cofactors and vitamins	Pantothenate and CoA metabolism	32484	LC/MS Neg	1900	808.1	102029-73-2;	444493	C00024	HMDB01206	0.909734	0.930042	0.509994	0.534647	0.765122	0.748738	0.32719	0.657124	0.502173	0.368337	0.469956	0.652191
901	acetylcarnitine	Lipid	Carnitine metabolism	32198	LC/MS Pos	1203	204.2	5080-50-2;	7045767	C02571	HMDB00201	0.992325	1.03029	1.00775	0.983595	1.10955	1.00768	1.61068	1.45618	1.21291	1.55888	2.02454	1.74419
670	acetylphosphate	Energy	Oxidative phosphorylation	15488	GC/MS	1263	211	94249-01-1;	186	C00227	HMDB01494	1.01053	1.01804	0.772412	0.767489	0.93778	0.967121	1.10798	1.23913	1.20553	1.15571	1.13087	1.09206
1198	adenine	Nucleotide	Purine metabolism, adenine containing	554	GC/MS	1804.2	264	73-24-5;	190	C00147	HMDB00034	1.93305	2.3503	1.93107	2.2389	2.29462	1.85858	1.1556	1.04308	1.04783	1.40801	1.68884	1.50342
1199	adenosine	Nucleotide	Purine metabolism, adenine containing	555	LC/MS Pos	1650	268.1	58-61-7;	60961	C00212	HMDB00050	0.627274	0.91663	1.29738	0.875399	1.57027	1.03251	0.717121	0.671625	0.591129	0.759304	0.776901	0.65467
1206	adenosine 2'-monophosphate (2'-AMP)	Nucleotide	Purine metabolism, adenine containing	36815	LC/MS Neg	1497	346.1	130-49-4;		C00946	HMDB11617	0.880371	1.44157	2.17527	1.38065	2.97995	1.39822	1	0.54167	0.54167	0.811504	1.33593	1.19259
1215	adenosine 3',5'-cyclic monophosphate (cAMP)	Nucleotide	Purine metabolism, adenine containing	2831	LC/MS Neg	1979	328.1	60-92-4;	274	C00575	HMDB00058	1.04754	1.04431	0.828036	1.09417	1.02301	0.754934	0.638956	0.717817	0.723159	0.773297	0.778509	0.753548
1207	adenosine 3'-monophosphate (3'-AMP)	Nucleotide	Purine metabolism, adenine containing	35142	LC/MS Neg	1268	346.1	84-21-9;	15938966	C01367	HMDB03540	0.974722	1.24572	1.26403	1.08383	1.28505	1.13022	1.02528	0.657791	0.800318	0.818635	1.13932	1.07771
1210	adenosine 5'-diphosphate (ADP)	Nucleotide	Purine metabolism, adenine containing	3108	LC/MS Neg	800	426.1	20398-34-9;	6022	C00008	HMDB01341	3.04703	3.4493	3.8721	3.24221	4.13391	3.23048	0.471084	0.463303	0.508713	0.471749	0.640391	0.814745
1335	adenosine 5'diphosphoribose	Cofactors and vitamins	Nicotinate and nicotinamide metabolism	558	LC/MS Neg	964	558.1	68414-18-6;	4475880	C00301	HMDB01178	7.92406	6.66453	4.54152	5.92648	3.63385	6.58845	2.19257	1.05862	1.09945	1.47451	2.48067	2.62508
1208	adenosine 5'-monophosphate (AMP)	Nucleotide	Purine metabolism, adenine containing	32342	LC/MS Pos	1210	348.1	149022-20-8;	15938965	C00020	HMDB00045	2.83098	3.90352	3.856	3.58226	4.16234	3.84345	0.763581	0.744706	0.73934	0.804731	1.0807	0.919297
735	adrenate (22:4n6)	Lipid	Long chain fatty acid	32980	LC/MS Neg	5684	331.3	2091-25-0;	5282844	C16527	HMDB02226	1.96843	3.96968	4.35769	4.89272	5.1539	2.45291	1.52185	1.0257	1.43858	2.03861	1.81574	2.76225
284	agmatine	Amino acid	Polyamine metabolism	15496	GC/MS	1526	174	2482-00-0;	199	C00179	HMDB01432	0.490272	0.86929	1	1.25358	1.4267	0.795321	1.19392	0.894757	0.490272	0.800261	1.31061	1.23804
32	alanine	Amino acid	Alanine and aspartate metabolism	1126	GC/MS	1147.6	115.9	56-41-7;	59507311724	C00041	HMDB00161	2.96491	3.59553	3.77156	3.33666	3.69313	2.58517	3.61451	2.76975	2.99083	3.60317	4.40271	2.79792
1248	allantoin	Nucleotide	Purine metabolism, urate metabolism	1107	GC/MS	1809.8	518.3	97-59-6;	204	C02350	HMDB00462	3.43466	5.13625	5.25152	5.01833	4.29987	4.05453	3.10056	2.82486	3.36482	3.40835	2.0645	3.04937
1372	alpha-tocopherol	Cofactors and vitamins	Tocopherol metabolism	1561	GC/MS	2305.4	502.5	59-02-9;10191-41-0;	14985	C02477	HMDB01893	0.98764	2.56099	0.770584	0.687336	0.719715	0.687336	0.883424	0.966664	1.06081	0.838308	0.932315	0.687336
614	arabitol	Carbohydrate	Nucleotide sugars, pentose metabolism	38075	GC/MS	1687.5	307.1	488-82-4;	94154	C00474	HMDB01851	1	1.39481	1.1661	1.33325	1.28698	1.27192	1.59203	1.3544	1.27766	1.59007	1.73797	1.34845
728	arachidonate (20:4n6)	Lipid	Long chain fatty acid	1110	LC/MS Neg	5525	303.4	506-32-1;	444899	C00219	HMDB01043	0.505998	0.967223	0.965205	0.874572	1.09178	0.663824	1.4516	1.03278	1.33359	1.8964	1.47198	1.95716
255	arginine	Amino acid	Urea cycle; arginine-, proline-, metabolism	1638	LC/MS Pos	650	175.2	1119-34-2;	5246487232	C00062	HMDB00517	0.826523	1.11766	1.29606	0.996914	1.26407	1.07912	1.61327	1.26034	1.49078	1.70776	2.0061	1.85605
25	asparagine	Amino acid	Alanine and aspartate metabolism	11398	GC/MS	1651.2	231	70-47-3;	62676992089	C00152	HMDB00168	2.20738	3.15091	3.49951	3.12155	3.75229	2.67082	1.65427	0.984748	0.606195	1.29727	1.40832	1.36209
24	aspartate	Amino acid	Alanine and aspartate metabolism	15996	GC/MS	1529.7	232	56-84-8;	5960	C00049	HMDB00191	0.958027	1.20105	1.20959	1.14015	1.24871	1.07439	1.00398	0.938119	1.05654	1.19738	1.21138	1.01328
390	aspartylleucine	Peptide	Dipeptide	40068	LC/MS Pos	2310	247.2	3062-14-4;	332962			2.21836	3.85188	4.16718	4.00954	4.30326	3.33056	1.73659	0.897798	0.86805	1.6363	2.28073	1.99736
340	aspartylphenylalanine	Peptide	Dipeptide	22175	LC/MS Pos	2538	281.1	13433-09-5;	93078		HMDB00706	2.41867	3.59657	4.21016	3.7992	4.13301	3.36881	2.41798	1.34277	1.31562	2.59668	4.31697	3.31267
28	beta-alanine	Amino acid	Alanine and aspartate metabolism	55	GC/MS	1451.8	174	56-41-7;107-95-9;	2394755801	C00099	HMDB00056	3.28339	2.55946	1.88194	2.09154	2.33737	2.69135	2.77703	3.2463	4.0596	3.44638	3.45445	2.13122
21	betaine	Amino acid	Glycine, serine and threonine metabolism	3141	LC/MS Pos	721	118.2	107-43-7;	247		HMDB00043	1.96505	2.07073	2.00421	2.05646	1.96889	1.98475	0.972429	0.891319	0.945771	1.11537	1.24792	1.02757
890	butyrylcarnitine	Lipid	Fatty acid metabolism (also BCAA metabolism)	32412	LC/MS Pos	2007	232.2	25576-40-3;	213144			4.43614	3.67024	3.11485	2.953	3.07915	3.82868	7.53895	5.65724	7.26917	6.83813	8.92974	6.58584
691	caprate (10:0)	Lipid	Medium chain fatty acid	1642	LC/MS Neg	5092	171.2	112-37-8;	2969	C01571	HMDB00511	0.863722	1.25652	0.816536	1.1194	0.907753	0.840836	0.65465	0.939759	0.878358	1.08598	1.18785	0.983925
687	caproate (6:0)	Lipid	Medium chain fatty acid	32489	LC/MS Neg	2766	115.2	142-62-1;	8892	C01585	HMDB00535	0.825036	1.35302	1.15829	0.897153	1	1.14453	1.06048	0.310445	0.426243	1.63029	1.36615	1.38895
689	caprylate (8:0)	Lipid	Medium chain fatty acid	32492	LC/MS Neg	4367	143.2	124-07-2;	379	C06423	HMDB00482	0.934232	0.894603	0.728278	0.455593	1.3938	0.805047	1.06577	0.812473	0.455593	0.712535	0.852045	0.455593
899	carnitine	Lipid	Carnitine metabolism	15500	LC/MS Pos	702	162.2	461-05-2;	10917			0.994679	0.977337	0.890467	0.948179	0.891622	0.929151	1.46018	1.44979	1.5557	1.47741	1.75287	1.40657
455	carnosine	Peptide	Dipeptide derivative	1768	LC/MS Neg	813	225.2	305-84-0;	4392246992100	C00386	HMDB00033	0.645185	0.6962	0.665771	0.697923	0.685241	0.68764	1.74819	1.30208	1.35434	1.57912	1.83467	1.84003
172	C-glycosyltryptophan*	Amino acid	Tryptophan metabolism	32675	LC/MS Pos	1912	367.1					1.56789	1.72688	1.529	1.61045	1.51835	1.62948	5.83456	5.13627	4.83531	5.58789	6.497	5.29879
1102	cholesterol	Lipid	Sterol/Steroid	63	GC/MS	2316.9	329.3	57-88-5;	6432564	C00187	HMDB00067	0.784679	0.889157	0.940341	0.83552	0.925401	0.793363	0.848857	0.9841	0.935787	0.97928	1.16188	0.87087
960	choline	Lipid	Glycerolipid metabolism	15506	LC/MS Pos	674	104.2	67-48-1;	170746			0.985363	0.999753	0.941157	0.97832	1.04157	0.984865	1.52114	1.70121	1.65003	1.70001	1.92847	1.62479
954	choline phosphate	Lipid	Glycerolipid metabolism	34396	LC/MS Pos	695	184.1	72556-74-2;	135437			0.992396	1.14609	1.11804	0.993597	1.12732	1.10201	1.25883	1.03097	1.13265	1.03839	1.3839	1.17305
710	cis-vaccenate (18:1n7)	Lipid	Long chain fatty acid	33970	GC/MS	1987	339.3	693-72-1;	5282761	C08367		1.01842	0.873519	1.13825	0.885803	1.1153	0.98158	0.84846	1.08082	1.02107	1.03432	0.944758	1.21107
648	citrate	Energy	Krebs cycle	1564	GC/MS	1763.4	273.1	77-92-9;	311	C00158	HMDB00094	0.759165	0.53092	0.525422	0.457012	0.518482	0.60568	1.11227	0.871914	0.980177	0.879711	0.933709	0.893296
263	citrulline	Amino acid	Urea cycle; arginine-, proline-, metabolism	2132	LC/MS Pos	715	176.1	372-75-8;	833	C00327	HMDB00904	0.817727	0.963379	1.05375	0.703494	1.13128	0.955578	13.1792	9.19731	8.9085	9.10313	17.7139	10.3241
1350	coenzyme A	Cofactors and vitamins	Pantothenate and CoA metabolism	2936	LC/MS Neg	1600	766.1	85-61-0;18439-24-2;	317	C00010	HMDB01423	0.848249	0.909739	0.986098	1.0139	0.922709	0.884268	0.158283	0.204518	0.23196	0.15358	0.17144	0.183666
274	creatine	Amino acid	Creatine metabolism	27718	LC/MS Pos	758	132.1	57-00-1;	586	C00300	HMDB00064	1.99994	1.93046	1.64415	1.7367	1.61792	2.02814	2.40925	2.35869	2.67259	2.50388	2.88359	2.25648
275	creatinine	Amino acid	Creatine metabolism	513	LC/MS Pos	730	114.1	60-27-5;	588	C00791	HMDB00562	1.68709	1.16929	1.15808	1.15586	1.33965	1.21909	1.28219	1.12707	1.44108	1.65215	1.24603	0.983137
229	cystathionine	Amino acid	Cysteine, methionine, SAM, taurine metabolism	15705	GC/MS	1979.6	218.1	535-34-2;	4083111834	C02291	HMDB00099	0.874387	0.928246	0.842863	1.19207	1.02003	0.979972	0.306848	0.38437	0.3417	0.290846	0.250145	0.255312
224	cysteine	Amino acid	Cysteine, methionine, SAM, taurine metabolism	31453	GC/MS	1560.1	218	52-90-4;56-89-3;	58626419722	C00097	HMDB00574	0.235846	0.385684	0.364983	0.265102	0.523871	0.268108	1.02275	0.963609	1.01416	1.26814	1.31731	0.941685
226	cysteine sulfinic acid	Amino acid	Cysteine, methionine, SAM, taurine metabolism	37443	GC/MS	1662	252	207121-48-0;	1093924855	C00606	HMDB00996	0.947809	0.996581	1.2458	1.30558	0.904712	1.00342	0.518577	0.47797	0.325581	0.397249	0.139918	0.152647
299	cysteine-glutathione disulfide	Amino acid	Glutathione metabolism	35159	LC/MS Pos	821	427.1	13081-14-6;	4247235		HMDB00656	0.71467	0.845255	0.826275	0.783327	0.784276	0.753061	0.847374	0.782246	0.775096	0.735327	1.04162	1.03139
376	cysteinylglycine	Peptide	Dipeptide	35637	GC/MS	1763	257	19246-18-5;	65270	C01419	HMDB00078	0.74229	1.06592	0.716227	0.85789	1.02713	0.875813	1.21597	1.33302	1.04777	1.21787	1.30919	1.26976
1251	cytidine	Nucleotide	Pyrimidine metabolism, cytidine containing	514	LC/MS Pos	1065	244	65-46-3;	6175	C00475	HMDB00089	0.246535	0.454994	0.538289	0.458117	0.670632	0.443725	1.36245	1.47914	1.29093	1.7676	1.78649	1.75886
965	cytidine 5'-diphosphocholine	Lipid	Glycerolipid metabolism	34418	LC/MS Pos	777	489.1	33818-15-4;				1.25269	1.43837	1.40936	1.34236	1.43963	1.3744	1	0.942941	0.909653	0.944512	1.10383	1.11186
1255	cytidine 5'-monophosphate (5'-CMP)	Nucleotide	Pyrimidine metabolism, cytidine containing	2372	LC/MS Pos	887	324	63-37-6;	7058165	C00055	HMDB00095	1.0848	1.16559	1.17407	1.06313	1.24485	1.16053	1.12004	0.977499	1.00483	1.10428	1.12374	0.963089
898	deoxycarnitine	Lipid	Carnitine metabolism	36747	LC/MS Pos	759	146.1	6249-56-5;	725	C01181	HMDB01161	1.10266	1.22389	1.23036	1.25706	1.16941	1.21114	1.33022	1.42392	1.43873	1.52056	1.39164	1.43491
724	dihomo-linoleate (20:2n6)	Lipid	Long chain fatty acid	17805	LC/MS Neg	5722	307.3	2091-39-6;	6439848	C16525		0.452981	0.952412	1.04759	1.05453	1.12343	0.561484	0.327935	0.1923	0.283581	0.397825	0.379131	0.570985
1104	dihydrocholesterol	Lipid	Sterol/Steroid	21131	GC/MS	2320.8	215.2	80-97-7;	6665		HMDB00908	0.559525	1.00198	0.998015	0.975255	0.767638	0.807553	0.880093	1.13528	1.09617	0.936638	1.32581	0.73202
254	dimethylarginine (SDMA + ADMA)	Amino acid	Urea cycle; arginine-, proline-, metabolism	36808	LC/MS Pos	812	203.2		123831	C03626	HMDB01539,HMDB03334	1.38213	1.40559	1.32509	1.39589	1.15683	1.39586	0.552636	0.459113	0.467858	0.461707	0.66954	0.483571
733	docosadienoate (22:2n6)	Lipid	Long chain fatty acid	32415	LC/MS Neg	6017	335.4	7370-49-2 ;	5282807	C16533		0.645152	1.29098	1.43254	1.32934	1.74286	0.751837	0.327684	0.333635	0.479818	0.505761	0.647029	0.412162
682	docosahexaenoate (DHA; 22:6n3)	Lipid	Essential fatty acid	19323	LC/MS Neg	5518	327.3	6217-54-5;	445580	C06429	HMDB02183	0.429505	0.691968	0.726775	0.69563	0.752775	0.472113	0.51473	0.416534	0.446964	0.626447	0.598437	0.826483
680	docosapentaenoate (n3 DPA; 22:5n3)	Lipid	Essential fatty acid	32504	LC/MS Neg	5574	329.4	2234-74-4 ;		C16513	HMDB01976	0.736582	1.32796	1.21896	1.25715	1.42076	0.906928	0.826129	0.489896	0.675664	0.931854	0.870312	1.27365
681	docosapentaenoate (n6 DPA; 22:5n6)	Lipid	Essential fatty acid	37478	LC/MS Neg	5625	329.4	25182-74-5;	6441454	C06429	HMDB13123	1	2.31071	2.68376	2.89754	3.14094	1.36238	1.17846	1.04542	1.02292	2.0626	1.09948	1.98032
734	docosatrienoate (22:3n3)	Lipid	Long chain fatty acid	32417	LC/MS Neg	5825	333.4	59708-86-0 ;	5312556	C16534	HMDB02823	0.3902	0.838719	1.16816	0.921226	1.14533	0.485332	0.246695	0.235974	0.315117	0.244683	0.235974	0.296669
679	eicosapentaenoate (EPA; 20:5n3)	Lipid	Essential fatty acid	18467	LC/MS Neg	5442	301.3	10-2005-9;10417-94-4;	446284	C06428	HMDB01999	0.578177	0.866064	0.63702	0.737313	0.860537	0.65454	0.965331	0.893113	1.02867	1.1636	0.928106	1.33128
722	eicosenoate (20:1n9 or 11)	Lipid	Long chain fatty acid	33587	LC/MS Neg	5955	309.4				HMDB02231	0.581798	0.881948	1.39004	0.922767	1.48422	0.686379	0.523131	0.40967	0.463365	0.657267	0.723664	0.879816
1818	erythritol	Xenobiotics	Sugar, sugar substitute, starch	20699	GC/MS	1517.5	217	149-32-6;		C00503	HMDB02994	4.63753	5.77907	5.69431	4.42866	5.56525	5.22562	3.84989	3.82937	3.92585	4.68938	4.71518	3.87804
515	erythronate*	Carbohydrate	Aminosugars metabolism	33477	GC/MS	1546.9	292.1	13752-84-6;	2781043		HMDB00613	4.8083	5.5034	4.60377	4.92222	5.12911	4.43043	12.2458	11.1509	10.9677	12.0696	15.3982	11.9449
955	ethanolamine	Lipid	Glycerolipid metabolism	1497	GC/MS	1304	174.1	141-43-5;		C00189	HMDB00149	0.881783	0.814671	0.694804	0.577471	0.756871	0.798388	4.74426	4.67807	3.80208	3.91685	5.94133	4.09814
1365	flavin adenine dinucleotide (FAD)	Cofactors and vitamins	Riboflavin metabolism	2134	LC/MS Neg	2413	784.1	146-14-5;84366-81-4;	643975	C00016	HMDB01248	0.557546	0.588563	0.544552	0.538141	0.604189	0.534984	0.365014	0.43249	0.368288	0.446867	0.475186	0.481955
537	fructose	Carbohydrate	Fructose, mannose, galactose, starch, and sucrose metabolism	31266	GC/MS	1762.7	204	57-48-7;	5984	C00095	HMDB00660	1.20803	2.62485	2.98293	2.23242	3.05772	1.96572	0.990597	0.443194	0.771487	1.05122	1.43696	1.44103
592	fructose-6-phosphate	Carbohydrate	Glycolysis, gluconeogenesis, pyruvate metabolism	12021	GC/MS	1994.9	315.1	103213-47-4;		C05345	HMDB00124	5.23718	5.98709	4.04124	3.62752	6.65193	4.85929	3.2933	1.41384	1.30438	1.91005	5.00458	4.2001
523	fucose	Carbohydrate	Aminosugars metabolism	15821	GC/MS	1682.2	204	2438-80-4;	3034656	C00382	HMDB00174	1.08136	1.03498	0.90516	1.05655	1.25639	0.799446	1.35588	1	1.10621	1.15143	1.2704	1.2532
663	fumarate	Energy	Krebs cycle	1643	GC/MS	1382.1	245	100-17-8;		C00122	HMDB00134		1.29341	1.6749	1.22524	1.59839	0.992746	1.13042	0.740173	0.768476	1.01392		1.08891
539	galactose	Carbohydrate	Fructose, mannose, galactose, starch, and sucrose metabolism	12055	GC/MS	1793.8	203.9	59-23-4;	3037556	C01582	HMDB00143	0.283384	0.979388	0.519949	0.669932	0.283384	0.738346	0.283384	0.913261	0.283384	0.283384	0.742039	0.814265
1824	galacturonate	Xenobiotics	Sugar, sugar substitute, starch	20758	GC/MS	1888.7	204	91510-62-2;	84740	C08348	HMDB02545	2.04876	2.09446	2.00246	1.95763	2.25107	2.22572	2.11483	2.37998	1.8859	1.97517	2.22775	2.56122
47	gamma-aminobutyrate (GABA)	Amino acid	Glutamate metabolism	1416	GC/MS	1539.7	304.1	56-12-2;	6992099119	C00334	HMDB00112	4.98168	4.96482	3.76561	3.81494	4.52138	5.40454	5.1596	6.15526	6.67173	6.86762	6.58879	5.03218
467	gamma-glutamylglutamate	Peptide	gamma-glutamyl	36738	LC/MS Pos	1036	277.1	1116-22-9;	92865			0.997552	0.860412	0.789488	0.794375	0.827793	0.894736	2.13794	2.28712	2.33807	2.09567	2.26247	1.54414
463	gamma-glutamylisoleucine*	Peptide	gamma-glutamyl	34456	LC/MS Pos	2644	261.2				HMDB11170	0.544334	0.540376	0.563165	0.544093	0.529792	0.545227	0.991711	0.761435	0.886601	1.00829	1.19249	0.949728
462	gamma-glutamylleucine	Peptide	gamma-glutamyl	18369	LC/MS Pos	2744	261.2	2566-39-4;	151023		HMDB11171	0.605758	0.507469	0.656441	0.470396	0.717291	0.550296	0.828463	0.770382	0.790774	0.970015	1.11958	0.839262
466	gamma-glutamylmethionine	Peptide	gamma-glutamyl	37539	LC/MS Pos	1993	279.2	17663-87-5;	7009567			0.905313	0.697889	0.905605	0.449084	0.711268	0.986771	0.177138	0.817935	1.51779	0.993537	0.830809	0.888708
470	gamma-glutamylphenylalanine	Peptide	gamma-glutamyl	33422	LC/MS Pos	2846	295.1	7432-24-8;	111299		HMDB00594	0.587544	0.517685	0.471002	0.556403	0.623499	0.586218	0.616296	1.00111	0.81042	0.678768	0.777013	0.794478
472	gamma-glutamylthreonine*	Peptide	gamma-glutamyl	33364	LC/MS Pos	977	249.1	5652-48-2;				0.23906	0.275152	0.2584	0.308962	0.292932	0.268023	0.439822	0.274956	0.265136	0.374928	0.536398	0.541794
460	gamma-glutamylvaline	Peptide	gamma-glutamyl	32393	LC/MS Pos	2040	247.2	2746-34-1;			HMDB11172	0.470099	0.603173	0.565312	0.438878	0.565468	0.489566	0.959921	1.0321	0.900669	0.967897	1.05039	0.72617
589	glucose	Carbohydrate	Glycolysis, gluconeogenesis, pyruvate metabolism	38507	GC/MS	1866.8	204.1	50-99-7;	79025	C00031	HMDB00122	0.449206	0.804449	0.951654	0.460013	1.26347	0.650463	1.0792	0.550405	0.533368	1.04835	3.2485	4.71433
588	glucose 1-phosphate	Carbohydrate	Glycolysis, gluconeogenesis, pyruvate metabolism	33755	GC/MS	1853	217.1	56401-20-8;	65533	C00103	HMDB01586	4.25721	6.24926	7.4198	5.79291	8.36062	6.11011	2.17182	1.71102	1.09783	2.24008	2.42097	1.67386
587	glucose-6-phosphate (G6P)	Carbohydrate	Glycolysis, gluconeogenesis, pyruvate metabolism	31260	GC/MS	2042.7	387.2	103192-55-8;		C00668	HMDB01401	7.10363	7.91854	5.71032	4.85601	8.86801	7.00287	3.78794	2.28068	2.27691	3.99543	5.63747	5.04827
39	glutamate	Amino acid	Glutamate metabolism	57	LC/MS Pos	700	148.1	56-86-0;	611	C00025	HMDB03339	2.55022	2.81217	2.62426	2.45514	2.63777	2.72289	3.18289	3.06252	3.07643	3.09021	3.56308	3.11449
44	glutamate, gamma-methyl ester	Amino acid	Glutamate metabolism	33487	LC/MS Pos	1062	162.1	1499-55-4 ;	73913			1.10017	1.10659	1.28945	1.38498	1.28829	1.49397	0.612695	0.429961	0.315665	0.930556	1.19491	0.363263
45	glutamine	Amino acid	Glutamate metabolism	53	LC/MS Pos	684	147.2	56-85-9;	69920865961	C00064	HMDB00641	0.680854	0.960204	0.841303	1.03538	1.26256	0.993183	1.08536	1.00682	1.36981	1.13023	1.15945	1.21019
298	glutathione, oxidized (GSSG)	Amino acid	Glutathione metabolism	27727	LC/MS Pos	1535	613.1	103239-24-3;	6535911215652	C00127	HMDB03337	0.98405	0.997157	0.898918	0.910719	0.81681	0.93381	1.1106	1.21606	1.11828	1.25434	1.39539	1.18805
295	glutathione, reduced (GSH)	Amino acid	Glutathione metabolism	2127	LC/MS Pos	1274	308.1	70-18-8;	124886	C00051	HMDB00125	0.962815	1.15706	1.05244	1.04985	1.03649	1.06719	1.75069	1.67823	1.62895	1.83381	1.91392	1.71704
585	glycerate	Carbohydrate	Glycolysis, gluconeogenesis, pyruvate metabolism	1572	GC/MS	1360.7	189	600-19-1;	752	C00258	HMDB00139	1.00713	0.952528	0.89316	0.925459	0.951135	0.842758	0.992867	0.64263	0.904446	1.02665	1.04486	1.14132
959	glycerol	Lipid	Glycerolipid metabolism	15122	GC/MS	1311	205	56-81-5;	753	C00116	HMDB00131	0.911883	1.00005	0.948631	0.960114	1.1035	0.947425	1.16281	1.12128	1.10838	1.2161	1.33414	1.15042
1436	glycerol 2-phosphate	Xenobiotics	Chemical	27728	GC/MS	1691.8	243	819-83-0;	2526	C02979,D01488	HMDB02520	0.775357	0.39665	0.838987	0.429339	0.520887	0.48087	1.87337	1.46074	2.27725	2.50845	2.41305	1.56441
961	glycerol 3-phosphate (G3P)	Lipid	Glycerolipid metabolism	15365	GC/MS	1719.7	357.1	29849-82-9;	754	C00093	HMDB00126	0.236964	0.230977	0.262209	0.228538	0.277289	0.287082	1.66416	2.21462	3.15232	3.59831	2.41198	1.74217
962	glycerophosphorylcholine (GPC)	Lipid	Glycerolipid metabolism	15990	LC/MS Pos	694	258.1	28319-77-9;	657272	C00670	HMDB00086	0.215956	0.250868	0.236149	0.20819	0.218429	0.227062	1.02599	1.17775	1.6596	1.6941	1.111	0.956509
1	glycine	Amino acid	Glycine, serine and threonine metabolism	11777	GC/MS	1166	101.9	56-40-6;	5257127750	C00037	HMDB00123	1.83881	2.46344	2.44494	2.27515	2.45569	2.08955	1.49823	1.08556	1.02163	1.29259	1.86794	1.54147
1430	glycolate (hydroxyacetate)	Xenobiotics	Chemical	15737	GC/MS	1119	177	79-14-1;	3698251757	C00160	HMDB00115	1.16474	0.923455	1.43583	0.66653	1.19296	0.562043	1.34337	0.562043	0.84413	0.652823	0.880247	1.012
318	glycylglutamate	Peptide	Dipeptide	34403	GC/MS	1969	549.3	7412-78-4;	99278			0.197957	0.197957	0.197957	0.197957	0.197957	0.197957	0.197957	0.197957	0.197957	0.197957	0.197957	0.197957
312	glycylglycine	Peptide	Dipeptide	21029	GC/MS	1757.9	174	556-50-3;	154889711163	C02037	HMDB11733	0.947976	1.03294	0.844431	0.967058	0.964366	0.886561	0.419245	0.925533	0.883674	0.568855	0.707991	0.643094
315	glycylisoleucine	Peptide	Dipeptide	36659	LC/MS Pos	2080	189.1	19461-38-2;				1.08288	1.43167	1.19291	0.999656	1.29783	0.915702	0.793335	0.706072	1.00034	1.02479	0.827137	0.786916
316	glycylleucine	Peptide	Dipeptide	34398	LC/MS Pos	2236	189.1	869-19-2;	928431548899	C02155	HMDB00759	1.26764	1.55391	1.49565	1.43755	1.43893	1.42377	0.887349	0.608304	0.605108	0.886215	1.08199	0.910738
319	glycylphenylalanine	Peptide	Dipeptide	33954	LC/MS Neg	2193	221.2	3321-03-7;	154934492953			0.986355	1.09746	1.29605	0.948044	1.02971	1.14755	1.36902	0.73293	0.748327	1.10174	0.790596	1.45528
314	glycylproline	Peptide	Dipeptide	22171	LC/MS Pos	1115	173.1	704-15-4;	30136256993386		HMDB00721	1.28771	1.43757	1.74753	1.53976	1.67607	1.58327	1.31773	1.04024	0.93332	1.21513	1.87696	1.52067
311	glycylvaline	Peptide	Dipeptide	18357	LC/MS Pos	1572	175.1	1963-21-9;	27248076994979			0.67105	0.637692	0.749819	0.819047	0.719429	1.12973	1.81706	1.53885	1.56422	1.36327	1.84632	1.33402
1220	guanine	Nucleotide	Purine metabolism, guanine containing	32352	LC/MS Pos	1022	152.1	73-40-5;	764	C00242	HMDB00132	0.356892	0.335413	0.355975	0.345289	0.378714	0.317293	0.82742	1.00352	0.822427	0.907117	0.996481	0.786564
1224	guanosine	Nucleotide	Purine metabolism, guanine containing	1573	LC/MS Neg	1675	282.1	118-00-3;	6802	C00387	HMDB00133	0.207648	0.392875	0.552964	0.633111	0.602774	0.324844	0.676727	0.750272	0.564181	0.91611	1.0357	0.913594
1227	guanosine 5'- monophosphate (5'-GMP)	Nucleotide	Purine metabolism, guanine containing	2849	LC/MS Pos	1300	364	5550-12-9;	761			1.37302	1.84451	2.12505	1.6192	2.36585	1.5957	0.264973	0.358495	0.376738	0.285701	0.352465	0.35395
1233	guanosine 5'-diphospho-fucose	Nucleotide	Purine metabolism, guanine containing	15903	LC/MS Neg	797	588.1	15839-70-0;				1.06443	1.09457	0.975842	0.885583	1.18169	0.899511	0.850859	0.733261	0.773819	0.988318	0.907315	0.951332
1297	gulono-1,4-lactone	Cofactors and vitamins	Ascorbate and aldarate metabolism	33454	GC/MS	1862	333.1	1128-23-0;	608	C01040	HMDB03466	5.2699	5.42359	5.7015	3.43994	5.69855	4.64795	3.19625	2.36366	2.39897	3.19144	3.7343	2.49347
902	hexanoylcarnitine	Lipid	Carnitine metabolism	32328	LC/MS Pos	3174	260.2	6920-35-0;	6426853	C01585	HMDB00705	1.03095	1.14934	1.15658	1.04967	1	1.04715	4.43164	3.55266	3.7118	4.3584	5.16748	4.65514
1395	hippurate	Xenobiotics	Benzoate metabolism	15753	LC/MS Neg	2136	178.1	495-69-2;	464	C01586	HMDB00714	1.41499	1.03637	1.0335	1.33644	1.42881	1.3287	0.985811	0.893588	0.910983	1.67032	1.04628	1
53	histidine	Amino acid	Histidine metabolism	59	LC/MS Neg	757	154.1	5934-29-2;	7733651426	C00135	HMDB00177	0.960315	1.15151	1.3005	1.3096	1.3016	1.00453	1.34671	0.941242	0.995049	1.11254	1.58244	1.15109
216	hydroxyisovaleroyl carnitine	Amino acid	Valine, leucine and isoleucine metabolism	35433	LC/MS Pos	1683	262.1	99159-87-2;				0.320355	0.5204	0.529105	0.439069	0.412563	0.390648	1.27314	1.34302	0.839467	1.12359	1.62542	1.33658
232	hypotaurine	Amino acid	Cysteine, methionine, SAM, taurine metabolism	590	GC/MS	1598.5	188	300-84-5;	107812	C00519	HMDB00965	4.27169	3.18675	2.38993	2.46997	2.87572	3.52348	5.47163	6.09947	7.89992	6.63124	7.01794	4.27813
1190	hypoxanthine	Nucleotide	Purine metabolism, (hypo)xanthine/inosine containing	3127	LC/MS Neg	1313	135.1	68-94-0;	790	C00262	HMDB00157	0.345946	0.449306	0.547513	0.410588	0.675074	0.432386	0.941139	0.986688	0.807827	1.08017	1.20552	1.07067
1192	inosine	Nucleotide	Purine metabolism, (hypo)xanthine/inosine containing	1123	LC/MS Neg	1630	267.2	58-63-9;				0.254847	0.564897	0.769723	0.622038	0.874912	0.485534	0.730485	0.786046	0.595335	0.949623	1.05656	1.02287
974	inositol 1-phosphate (I1P)	Lipid	Inositol metabolism	1481	GC/MS	2057.8	318.1	106032-59-1;			HMDB00213	0.896783	0.81866	0.734231	0.776535	0.682907	0.694472	0.957072	1.16107	1.22364	0.994993	1.16215	0.813293
595	Isobar: fructose 1,6-diphosphate, glucose 1,6-diphosphate, myo-inositol 1,4 or 1,3-diphosphate	Carbohydrate	Glycolysis, gluconeogenesis, pyruvate metabolism	36984	LC/MS Neg	572	339					9.86662	12.4129	12.9305	14.3876	9.9343	11.4979	0.734534	1.07639	1.1433	0.961181	1.70737	0.985613
629	Isobar: ribulose 5-phosphate, xylulose 5-phosphate	Carbohydrate	Nucleotide sugars, pentose metabolism	37288	GC/MS	1935	357.2					0.858012	1.23094	1.42672	1.05078	1.29738	1.05658	0.830122	0.512067	0.465771	0.950817	1.06745	1.16581
519	Isobar: UDP-acetylglucosamine, UDP-acetylgalactosamine	Carbohydrate	Aminosugars metabolism	38673	LC/MS Neg	661	606.1					1.25413	1.49267	0.935638	0.812088	1.18176	1.18897	0.654171	1.02488	0.89049	1.09234	1	0.900751
210	isobutyrylcarnitine	Amino acid	Valine, leucine and isoleucine metabolism	33441	LC/MS Pos	1941	232.2	25518-49-4;				1.22176	1.53712	1.55907	1.2772	1.71633	1.61043	4.40998	4.76719	3.64571	5.41542	5.00732	4.52274
190	isoleucine	Amino acid	Valine, leucine and isoleucine metabolism	1125	LC/MS Pos	1614	132.1	73-32-5;	791	C00407	HMDB00172	1.13786	1.23165	1.22415	1.22042	1.23913	1.15795	1.36993	1.15374	1.08277	1.34586	1.63926	1.37169
402	isoleucylalanine	Peptide	Dipeptide	40046	LC/MS Pos	1686	203.2	24787-73-3;	52460095246010			1.55856	1.89584	1.20314	1.69612	1.43213	1.85452	1.29421	0.740356	1.02841	1.15584	2.00162	1.00206
405	isoleucylglutamine	Peptide	Dipeptide	40019	LC/MS Pos	1530	260.2					1.23759	1.2796	1.49821	1.43641	1.37662	1.81281	1.80478	1.13458	1.03115	1.75266	1.46869	2.21389
406	isoleucylglycine	Peptide	Dipeptide	40008	LC/MS Pos	1732	189.2	868-28-0;	342532			2.02644	2.50152	2.32887	2.37333	2.28348	2.39426	1.38343	0.771623	0.872828	1.23418	1.65401	1.32635
409	isoleucylserine	Peptide	Dipeptide	40012	LC/MS Pos	1472.5	219.2	6403-14-1;				1.82318	2.21492	2.49522	1.66058	2.29396	2.05229	0.939519	1.05653	0.638287	1.12071	1.42927	1.6991
215	isovalerylcarnitine	Amino acid	Valine, leucine and isoleucine metabolism	34407	LC/MS Pos	2533	246.2		6426851		HMDB00688	2.26586	2.29156	2.37571	2.22562	2.29226	2.20299	3.22463	2.72015	2.56528	2.91129	3.82564	3.19137
152	kynurenine	Amino acid	Tryptophan metabolism	15140	LC/MS Pos	1902	209.1	2922-83-0;	1611666971029	C00328	HMDB00684	1.03725	1.15766	1.01621	1.07927	1.14718	1.03151	0.983791	0.630348	0.511827	0.703802	0.735612	0.715285
604	lactate	Carbohydrate	Glycolysis, gluconeogenesis, pyruvate metabolism	527	GC/MS	1102.8	116.9	79-33-4;	612	C00186	HMDB00190	1.09766	1.22262	1.44938	1.38876	1.37814	1.0998	1.32405	1.17155	1.08106	1.2751	1.52945	1.4001
544	lactose	Carbohydrate	Fructose, mannose, galactose, starch, and sucrose metabolism	567	GC/MS	2134	204	5965-66-2;	6134	C00243	HMDB00186	0.793938	0.769576	0.751311	0.643504	0.687411	0.664216	0.417919	0.326574	0.445294	0.497514	0.512269	0.4272
694	laurate (12:0)	Lipid	Medium chain fatty acid	1645	LC/MS Neg	5288	199.3	143-07-7;	3893	C02679	HMDB00638	0.953983	0.970009	1.08097	0.988835	0.985452	0.957587	1.00279	0.904872	0.90005	0.950125	1.00753	1.10373
191	leucine	Amino acid	Valine, leucine and isoleucine metabolism	60	LC/MS Pos	1674	132.2	61-90-5;	70457986106	C00123	HMDB00687	1.0612	1.25423	1.20148	1.24616	1.28026	1.17968	1.85147	1.42096	1.39574	1.79382	2.12179	1.73298
417	leucylglutamate	Peptide	Dipeptide	40021	LC/MS Pos	1716	261.2		52595895259590			1.06099	1.30151	1.31387	1.10279	1.32924	1.20623	1.66787	1.20107	0.759424	1.61429	1.93075	1.53355
418	leucylglycine	Peptide	Dipeptide	40045	LC/MS Pos	1800	189.2	686-50-0;	79070			1.48751	1.88346	1.84953	1.21299	1.4041	1.60704	3.528	3.1039	2.32991	3.81941	3.20643	4.5556
359	leucylproline	Peptide	Dipeptide	35663	LC/MS Pos	2395	229.1	87178-63-0;			HMDB11175	2.24319	2.86629	3.42946	3.16159	3.3078	2.28997	6.50066	3.06451	2.5358	5.8734	6.32972	6.24364
737	lignocerate (24:0)	Lipid	Long chain fatty acid	1364	GC/MS	2211	425.4	557-59-5;	11197	C08320	HMDB02003	0.759265	1.43751	0.390846	0.51698	0.638915	0.633181	1.27172	0.854505	0.425481	0.695141	0.684293	1.077
673	linoleate (18:2n6)	Lipid	Essential fatty acid	1105	LC/MS Neg	5533	279.3	60-33-3;	5280450	C01595	HMDB00673	0.667558	1.14951	1.3421	1.19877	1.43853	0.823362	0.661782	0.489262	0.577555	0.807743	0.708057	1.01069
677	linolenate [alpha or gamma; (18:3n3 or 6)]	Lipid	Essential fatty acid	34035	LC/MS Neg	5450	277.3			C06427	HMDB01388	0.756545	1.39059	1.10149	1.22178	1.79157	1.06869	0.530503	0.439235	0.492297	0.792388	0.592594	0.81818
75	lysine	Amino acid	Lysine metabolism	1301	GC/MS	1836.7	317.2	56-87-1;	5962	C00047	HMDB00182	0.88075	0.931282	0.845686	1.03017	0.910011	0.914466	0.672405	0.60831	0.524784	0.558558	0.910323	0.711722
667	malate	Energy	Krebs cycle	1303	GC/MS	1502	233	6915-15-7;	525	C00149	HMDB00156	1.26397	1.46947	1.42944	1.22534	1.44352	1.38801	0.971194	0.794203	0.83885	0.872991	1.25414	1.03918
548	mannitol	Carbohydrate	Fructose, mannose, galactose, starch, and sucrose metabolism	15335	GC/MS	1839	319.1	69-65-8;	6251	C00392	HMDB00765	1.23793	1.14786	1.39826	1.12393	0.876065	1.39193	1.97223	1.28817	1.2698	1.6565	1.9677	1.21037
554	mannose-6-phosphate	Carbohydrate	Fructose, mannose, galactose, starch, and sucrose metabolism	1470	GC/MS	2035.9	387.2	70442-25-0;104872-94-8;		C00275	HMDB01078	6.03832	7.78685	6.92015	6.46209	8.76683	7.83946	2.76395	2.05933	2.07762	2.28273	4.26299	3.49843
704	margarate (17:0)	Lipid	Long chain fatty acid	1121	LC/MS Neg	5733	269.3	506-12-7;	10465		HMDB02259	0.546572	1.10686	1.76876	1.85366	1.83838	0.85697	0.774415	0.496861	0.709603	1.08423	1.20119	1.14499
727	mead acid (20:3n9)	Lipid	Long chain fatty acid	35174	LC/MS Neg	5642	305.4	20590-32-3;	5312531		HMDB10378	0.108426	0.355799	0.413807	0.383127	0.38824	0.216074	0.124588	0.088848	0.124807	0.21075	0.133009	0.177916
237	methionine	Amino acid	Cysteine, methionine, SAM, taurine metabolism	1302	LC/MS Pos	1252	150.1	63-68-3;	69920876137	C00073	HMDB00696	0.968357	1.26872	1.24116	1.25048	1.17999	1.08751	1.39304	1.00014	0.959868	1.25657	1.58087	1.31137
230	methionine sulfoxide	Amino acid	Cysteine, methionine, SAM, taurine metabolism	18374	LC/MS Pos	729	166.1	3226-65-1;	1589801548907	C02989	HMDB02005	1.0361	1.40671	0.927331	1.17944	1.18991	1.01545	0.814519	0.643446	1	0.728355	0.720509	1.06695
1457	methyl-alpha-glucopyranoside	Xenobiotics	Chemical	20714	GC/MS	1809	204	97-30-3;	64947	C04942,C02603		0.797641	1.09258	1.30044	0.754377	1.42943	1.2317	4.11378	2.24336	2.40551	3.34571	3.95504	3.93044
1294	methylphosphate	Nucleotide	Purine and pyrimidine metabolism	37070	GC/MS	1221	240.9	7023-27-0;	13130			1.19094	1.48728	1.36049	1.22164	1.40093	1.4451	1.16052	1.2419	1.22311	1.14142	1.0141	1.15287
971	myo-inositol	Lipid	Inositol metabolism	19934	GC/MS	1924.9	217	87-89-8;		C00137	HMDB00211	59.051	74.793	61.4406	66.0143	60.8593	67.2074	56.4655	49.6017	48.1423	64.3896	71.6847	55.9111
698	myristate (14:0)	Lipid	Long chain fatty acid	1365	GC/MS	1789.7	285.2	544-63-8;	11005	C06424	HMDB00806	0.875104	0.904393	1.11131	0.903662	1.0757	0.849895	0.768746	0.92249	0.956584	0.913233	1.00519	0.938777
1081	N,N-dimethylsphingosine	Lipid	Sphingolipid	32460	LC/MS Pos	5192	328.3	119567-63-4;	5282309	C13914		0.980005	0.980005	0.980005	0.980005	0.980005	0.980005	0.980005	0.980005	0.980005	0.980005	0.980005	0.980005
1201	N1-methyladenosine	Nucleotide	Purine metabolism, adenine containing	15650	LC/MS Pos	1356	282.1	15763-06-1;	5460178	C02494	HMDB03331	0.908932	0.612038	0.585067	0.353749	0.512554	0.825246	1.18153	1.12424	1.71557	0.855978	0.975077	0.365455
85	N6-acetyllysine	Amino acid	Lysine metabolism	36752	LC/MS Pos	1134	189.1	692-04-6;	699197892832	C02727	HMDB00206	0.812439	0.948505	1.04426	1.23024	1.05677	0.985673	0.639512	0.675133	0.569036	0.569004	0.664632	0.56374
1242	N6-carbamoylthreonyladenosine	Nucleotide	Purine metabolism, guanine containing	35157	LC/MS Pos	2656	413	24719-82-2;				1.22735	1.22758	1.55303	1.47592	1.95561	1.46551	1.53744	0.921699	1.10774	1.41422	1.81161	1.13504
33	N-acetylalanine	Amino acid	Alanine and aspartate metabolism	1585	LC/MS Neg	882	130.1	97-69-8;	88064	C02847	HMDB00766	2.65211	2.58472	1.78187	1.94705	2.40844	1.75209	0.803874	1.48427	0.843914	1.08026	1.25838	1.15378
35	N-acetylaspartate (NAA)	Amino acid	Alanine and aspartate metabolism	22185	LC/MS Pos	1222	176.1	997-55-7;997-55-7 ;	65065	C01042	HMDB00812	1.09633	1.09421	1.0965	0.927357	0.998284	1.24971	1.49941	1.26052	1.07766	1.27258	1.92184	1.40574
51	N-acetyl-aspartyl-glutamate (NAAG)	Amino acid	Glutamate metabolism	35665	LC/MS Pos	1563	305	3106-85-2;	5255	C12270	HMDB01067	1.22731	0.708364	1	0.708551	0.894199	1.30284	2.43134	2.03322	2.09197	2.0032	3.07601	2.0871
513	N-acetylglucosamine 6-phosphate	Carbohydrate	Aminosugars metabolism	15107	LC/MS Neg	628	300.1	102029-88-9;	10040501	C00357	HMDB02817	0.166199	0.166199	0.166199	0.166199	0.166199	0.166199	0.166199	0.166199	0.166199	0.166199	0.166199	0.166199
50	N-acetylglutamate	Amino acid	Glutamate metabolism	15720	LC/MS Pos	1492	190.1	5817-08-3;	1549099	C00624	HMDB01138	1.21068	1.45532	1.08901	1.15128	1.23725	1.64776	2.14523	1.80302	1.80329	1.81631	2.44376	1.78578
239	N-acetylmethionine	Amino acid	Cysteine, methionine, SAM, taurine metabolism	1589	LC/MS Neg	1805	190.1	65-82-7;	448580	C02712	HMDB11745	1.4163	1.63736	1.84936	1.66297	1.83551	1.49471	0.591905	0.488976	0.469456	0.611654	0.802985	0.708406
517	N-acetylneuraminate	Carbohydrate	Aminosugars metabolism	1592	GC/MS	2074.9	245	131-48-6;		C00270	HMDB00230	1.42796	1.77522	1.99415	1.94972	1.71498	1.72912	0.96598	1.23222	1.24848	0.912203	1.23631	0.996516
264	N-acetylornithine	Amino acid	Urea cycle; arginine-, proline-, metabolism	15630	LC/MS Pos	875	175.2	6205-08-9;	6992102439232	C00437	HMDB03357	1.12778	1.10894	1.1771	0.869638	0.69138	1.37453	0.756103	0.552147	0.481138	0.650129	0.303263	0.554973
283	N-acetylputrescine	Amino acid	Polyamine metabolism	37496	LC/MS Pos	895	131.1	18233-70-0;	122356	C02714	HMDB02064	3.32544	2.71405	2.39942	2.92003	3.0619	2.17602	2.3896	1.94316	1.96255	1.76868	3.06017	1.37226
10	N-acetylserine	Amino acid	Glycine, serine and threonine metabolism	37076	GC/MS	1526	218	97-14-3;	65249		HMDB02931	1.88244	2.58353	2.05666	2.35483	1.66798	2.39933	1.26139	0.723737	1.03535	1.41148	1.59928	1.47413
18	N-acetylthreonine	Amino acid	Glycine, serine and threonine metabolism	33939	LC/MS Neg	846	160.1		4651717	C01118		2.86807	2.79108	1.87721	2.64776	2.93745	2.59183	3.63643	1.91345	2.87003	2.83552	4.23319	3.35145
759	n-Butyl Oleate	Lipid	Fatty acid, ester	36802	GC/MS	2045	265.3	142-77-8;	5354342			0.992974	0.829751	0.965185	1.00703	0.830938	1.24053	0.628813	0.725728	1.09998	0.778376	1.09071	0.474464
231	N-formylmethionine	Amino acid	Cysteine, methionine, SAM, taurine metabolism	2829	LC/MS Neg	1541	176.1	4289-98-9;	439750	C03145	HMDB01015	1.3308	1.24256	1.8924	1.46395	1.65575	1.24426	0.800857	0.980317	0.465136	0.821499	0.579718	0.682859
1324	nicotinamide	Cofactors and vitamins	Nicotinate and nicotinamide metabolism	594	LC/MS Pos	1267	123.1	98-92-0;	936	C00153	HMDB01406	1.54198	2.1579	1.88583	1.92349	2.05239	1.99818	1.34806	1.02239	0.817022	1.15375	1.5623	1.19369
1327	nicotinamide adenine dinucleotide (NAD+)	Cofactors and vitamins	Nicotinate and nicotinamide metabolism	5278	LC/MS Pos	1370	664	53-84-9;	1.08977e+18	C00003	HMDB00902	1.06695	1.10888	0.969442	0.99976	1.00024	1.03912	1.32082	1.43195	1.38698	1.39751	1.49257	1.38776
1330	nicotinamide adenine dinucleotide phosphate (NADP+)	Cofactors and vitamins	Nicotinate and nicotinamide metabolism	32380	LC/MS Pos	1330	743.9	53-59-8 ;1184-16-3;	5885	C00005	HMDB00217	0.969305	0.92627	0.92761	0.904709	0.822734	1.03069	0.287203	0.328745	0.349461	0.321896	0.257738	0.327991
1328	nicotinamide adenine dinucleotide reduced (NADH)	Cofactors and vitamins	Nicotinate and nicotinamide metabolism	31475	LC/MS Neg	1554	664.1	58-68-4 ;606-68-8;	439153	C00004	HMDB01487	2.14956	2.02577	2.2612	3.49428	1.53434	1.93368	1.92142	2.46075	2.4054	2.23745	5.97811	1.86809
1334	nicotinamide riboside*	Cofactors and vitamins	Nicotinate and nicotinamide metabolism	33013	LC/MS Pos	955	255.1	1341-23-7;				0.390093	0.390093	0.390093	0.390093	0.390093	0.390093	0.752364	0.390093	0.390093	0.904028	0.785139	0.770341
303	norophthalmate*	Amino acid	Glutathione metabolism	39251	LC/MS Pos	989	276.1	1116-21-8;	5489007		HMDB05766	0.461684	0.448809	0.392893	0.453716	0.496414	0.467886	2.21933	2.80807	2.55982	3.32411	2.56337	1.88254
904	octanoylcarnitine	Lipid	Carnitine metabolism	33936	LC/MS Pos	4100	288.3	3671-77-0;	123701			1.04751	0.807336	1.09923	1.2671	0.847232	0.952493	9.06635	6.96001	8.61951	8.61171	9.0437	7.68652
708	oleate (18:1n9)	Lipid	Long chain fatty acid	1359	GC/MS	1984.4	339.2	112-80-1;	445639	C00712	HMDB00207	0.915738	1.01422	1.21657	0.901089	1.1648	0.863175	0.882432	0.851149	1.02832	0.826827	0.78777	0.983622
914	oleoylcarnitine	Lipid	Carnitine metabolism	35160	LC/MS Pos	5202	426.4				HMDB05065	1.49486	1.09979	1.10902	0.89406	1.07422	1.24264	1.92455	2.02941	3.42281	2.19602	2.40696	2.00438
300	ophthalmate	Amino acid	Glutathione metabolism	34592	LC/MS Pos	1457	290.1	495-27-2;	9817431		HMDB05765	0.588451	0.649088	0.60146	0.561942	0.590958	0.620395	0.788019	0.836586	0.99117	1.06734	0.840198	0.70713
258	ornithine	Amino acid	Urea cycle; arginine-, proline-, metabolism	1493	GC/MS	1763.8	141.9	3184-13-2;	6262	C00077	HMDB03374	2.90105	2.55167	2.45349	2.65441	2.97396	3.04673	1.57483	1.71116	2.00068	2.33446	2.52	1.92989
701	palmitate (16:0)	Lipid	Long chain fatty acid	1336	GC/MS	1905.4	313.2	57-10-3;	985	C00249	HMDB00220	0.871012	0.955974	1.25657	0.815844	1.20606	1.02857	0.884953	0.92801	1.00517	0.932545	0.860222	1.00654
702	palmitoleate (16:1n7)	Lipid	Long chain fatty acid	1507	GC/MS	1895.6	311.2	373-49-9;	445638	C08362	HMDB03229	0.739331	0.753278	0.887986	0.82599	0.977381	0.561284	0.752538	0.653099	1.17433	0.735989	0.859359	1.02618
1086	palmitoyl sphingomyelin	Lipid	Sphingolipid	37506	GC/MS	2524	311.3		9939941			0.626836	0.666522	0.605648	0.511437	0.58801	0.586939	1.0266	1.17222	1.12108	1.11763	1.35028	0.995541
912	palmitoylcarnitine	Lipid	Carnitine metabolism	22189	LC/MS Pos	5179	400.4	6865-14-1;	461			2.47446	1.74898	0.106082	1.60547	1.70945	2.16061	2.5362	2.27957	3.56664	2.8483	2.92536	2.63691
1347	pantothenate	Cofactors and vitamins	Pantothenate and CoA metabolism	1508	LC/MS Pos	2218	220.1	137-08-6;	6613	C00864	HMDB00210	2.26695	2.5544	2.42443	2.35034	2.55597	2.39266	2.40651	2.18137	2.13563	2.46735	2.77262	2.45476
690	pelargonate (9:0)	Lipid	Medium chain fatty acid	12035	LC/MS Neg	4847	157.2	112-05-0;	5461016	C01601	HMDB00847	0.893374	1.01871	0.90067	0.941301	0.962616	0.888436	0.873288	0.981289	0.859444	1.02856	1.13944	0.802114
1593	penicillin G	Xenobiotics	Drug	37468	LC/MS Pos	3314	335.2	69-57-8;	2349	C05551		0.461508	0.461508	0.461508	0.461508	0.461508	0.461508	0.461508	0.461508	0.461508	0.461508	0.461508	0.461508
700	pentadecanoate (15:0)	Lipid	Long chain fatty acid	1361	GC/MS	1853.5	299.2	1002-84-2;	13849	C16537	HMDB00826	0.983969	1.16541	1.27346	0.745331	0.864881	0.812119	0.824344	0.900603	1.19858	1.09063	1.46681	0.964581
1488	phenol red	Xenobiotics	Chemical	36817	LC/MS Neg	3650	353.1	143-74-8;	4766	C12600		0.771981	0.853073	0.873478	0.852852	0.903013	0.78431	1.46609	1.3613	1.25726	1.6452	1.76923	1.5351
134	phenylacetylglycine	Amino acid	Phenylalanine & tyrosine metabolism	33945	LC/MS Neg	2377	192.1	500-98-1;	68144	C05598	HMDB00821	0.912053	1.39477	1.32076	1.47033	1.34962	1.08714	0.803478	0.842172	0.946384	1.37556	1.08645	1.05044
89	phenylalanine	Amino acid	Phenylalanine & tyrosine metabolism	64	LC/MS Pos	2056	166.1	63-91-2;	69256656140	C00079	HMDB00159	0.986957	1.17818	1.17903	1.1063	1.1884	1.09877	1.20746	0.948259	1.01304	1.14836	1.40833	1.2144
430	phenylalanylserine	Peptide	Dipeptide	40016	LC/MS Pos	1808	253.1	16053-39-7;	9859812			1.76212	1.81046	1.56732	1.8046	1.85575	1.97211	1.92902	0.907373	0.795508	1.76025	1.61093	1.97843
671	phosphate	Energy	Oxidative phosphorylation	11438	GC/MS	1307.7	298.9	7664-38-2 ;	1061	C00009	HMDB01429	0.921757	0.964186	0.954863	0.915675	1.0685	0.828829	1.02323	0.989927	0.842809	1.09145	1.10017	0.892001
602	phosphoenolpyruvate (PEP)	Carbohydrate	Glycolysis, gluconeogenesis, pyruvate metabolism	597	GC/MS	1595.4	369	10526-80-4;	1005	C00074	HMDB00263	0.079344	0.079344	0.079344	0.079344	0.079344	0.079344	0.079344	0.079344	0.079344	0.079344	0.079344	0.079344
956	phosphoethanolamine	Lipid	Glycerolipid metabolism	12102	GC/MS	1577.3	299.1	1071-23-4;	52323241015	C00346	HMDB00224	0.432922	0.380362	0.386547	0.280349	0.21564	0.148041	2.73093	1.90969	1.26008	1.98331	3.33264	3.33163
1349	phosphopantetheine	Cofactors and vitamins	Pantothenate and CoA metabolism	15504	LC/MS Neg	1624	357.2	NA;	115254	C01134	HMDB01416	0.676793	0.8924	1.217	0.987701	1.14753	0.759038	1.41616	1.0123	0.676857	1.15899	1.79789	1.53048
80	pipecolate	Amino acid	Lysine metabolism	1444	LC/MS Pos	1120	130.1	4043-87-2;	849	C00408	HMDB00070	0.299487	0.253216	0.632771	0.253216	0.253216	0.904894	0.297083	0.265732	0.35192	0.679732	0.416906	0.253216
363	pro-hydroxy-pro	Peptide	Dipeptide	35127	LC/MS Pos	960	229.2	18684-24-7;	11673055		HMDB06695	4.28644	4.77438	4.68588	4.49756	4.62684	4.37055	1.8364	1.57855	1.48874	1.32186	2.14465	1.97437
261	proline	Amino acid	Urea cycle; arginine-, proline-, metabolism	1898	LC/MS Pos	796	116.1	147-85-3;	1457426971047	C00148	HMDB00162	3.12942	3.27395	2.89811	3.03651	3.02787	3.14655	2.4937	2.16312	2.11868	2.25767	2.90041	2.43333
348	prolylalanine	Peptide	Dipeptide	40705	LC/MS Pos	925	187.1	6422-36-2;	418041			1.19236	2.15698	2.77995	1.87853	2.09567	2.14668	1.49822	0.588683	0.675452	1.00546	1.84106	1.24494
347	prolylglycine	Peptide	Dipeptide	40703	LC/MS Pos	875	173.1	2578-57-6;	74080766426709			2.45438	2.56647	3.11609	2.444	2.56721	2.65966	2.34449	1.34035	1.71291	1.90443	3.48694	2.3097
888	propionylcarnitine	Lipid	Fatty acid metabolism (also BCAA metabolism)	32452	LC/MS Pos	1589	218.2	17298-37-2 ;	107738	C03017	HMDB00824	1.05444	1.14612	0.912096	0.983061	0.974131	1.08306	1.79201	2.43397	2.51016	2.36144	2.243	1.82171
492	pro-pro-pro	Peptide	Polypeptide	40654	LC/MS Pos	1720.1	310.2	19285-44-0;	4475718			0.932412	1.11574	1.39254	1.04687	1.22285	1.16987	0.970074	0.743191	0.685443	0.817399	1.16149	0.852157
830	prostaglandin A2	Lipid	Eicosanoid	19761	LC/MS Neg	4875	333.3	13345-50-1;	5280880	C05953	HMDB02752	0.781479	0.781479	0.781479	0.781479	0.781479	0.781479	0.781479	0.781479	0.781479	0.781479	0.781479	0.781479
834	prostaglandin E2	Lipid	Eicosanoid	7746	LC/MS Neg	4562	351.3	363-24-6;	5280360	C00584	HMDB01220	0.555526	0.452997	0.411746	0.316951	0.751535	0.276733	0.276733	0.276733	0.276733	0.276733	0.276733	0.276733
1280	pseudouridine	Nucleotide	Pyrimidine metabolism, uracil containing	33442	LC/MS Neg	1104	243.1	1445-07-4;		C02067	HMDB00767	0.81735	0.996467	1.06627	0.875115	1.16259	1.04961	0.352331	0.565147	0.335203	0.880844	0.972697	0.368135
282	putrescine	Amino acid	Polyamine metabolism	1408	GC/MS	1705.8	174	110-60-1;		C00134	HMDB01414	2.31923	2.0543	1.9971	1.84439	1.92079	2.30609	3.45505	3.51208	3.04435	3.29107	4.32566	3.00662
1364	pyridoxal	Cofactors and vitamins	Pyridoxal metabolism	1651	LC/MS Pos	1210	168.1	65-22-5;	1050	C00250	HMDB01545	0.667208	0.528622	0.397901	0.505513	0.731872	0.764413	1.04966	1.31244	1.41908	1.25223	1.29944	0.908989
46	pyroglutamine*	Amino acid	Glutamate metabolism	32672	LC/MS Pos	764	129.2		134508			1.66217	1.4486	1.3562	1.37324	1.29053	1.42166	2.04026	1.84262	2.2385	2.15736	1.93368	1.88112
672	pyrophosphate (PPi)	Energy	Oxidative phosphorylation	2078	GC/MS	1642.3	451	1466-09-3;	644102	C00013	HMDB00250	1.55903	0.912534	0.454083	0.478748	0.805574	1.33979	1.96177	2.09698	2.38108	1.86028	1.95871	1.79435
603	pyruvate	Carbohydrate	Glycolysis, gluconeogenesis, pyruvate metabolism	599	GC/MS	1130.6	217	127-17-3;	107735	C00022	HMDB00243	0.567337	0.895552	0.620513	1.03122	0.887	0.820085	0.884938	0.984519	0.982448	0.990573	0.845946	0.989621
616	ribitol	Carbohydrate	Nucleotide sugars, pentose metabolism	15772	GC/MS	1692.4	217	488-81-3;		C00474	HMDB00508	0.806325	1.0274	1.14321	1.02523	1.10413	1.03321	1.26963	1.20396	1.10597	1.16133	1.29682	1.1742
1366	riboflavin (Vitamin B2)	Cofactors and vitamins	Riboflavin metabolism	1827	LC/MS Pos	3111	377.2	83-88-5;	493570	C00255	HMDB00244	0.84662	0.851174	0.392649	0.52785	0.524242	0.810953	0.860123	0.70411	0.507242	0.67876	1.06411	0.808325
622	ribose	Carbohydrate	Nucleotide sugars, pentose metabolism	12083	GC/MS	1652	204	50-69-1;	5311110	C00121	HMDB00283	0.974896	1.48988	1.59722	1.33454	1.99819	1.1772	0.867035	0.598855	0.450743	0.898838	1.0251	0.814221
236	S-adenosylhomocysteine (SAH)	Amino acid	Cysteine, methionine, SAM, taurine metabolism	15948	LC/MS Neg	1821	383.1	979-92-0;		C00021	HMDB00939	0.767077	0.994711	1.17858	1.03179	1.11634	0.908746	0.95056	0.933428	0.808948	1.00529	1.13218	0.981189
979	scyllo-inositol	Lipid	Inositol metabolism	32379	GC/MS	1893.8	318.2	488-59-5;		C06153	HMDB06088	24.9718	26.2836	26.8907	22.8204	26.1285	25.4484	16.5229	17.1509	19.4798	20.5933	21.3594	15.9563
619	sedoheptulose-7-phosphate	Carbohydrate	Nucleotide sugars, pentose metabolism	35649	GC/MS	2070	691.35	2646-35-7;	616	C05382	HMDB01068	1.41343	2.45212	1.99016	1.34905	2.32742	1.41328	1.48878	1	1.13316	1.7809	1.92994	1.44729
8	serine	Amino acid	Glycine, serine and threonine metabolism	1648	GC/MS	1389.1	204	56-45-1;	59516857581	C00065	HMDB03406	0.822595	1.05155	1.09275	1.03119	1.14758	0.931592	1.97174	1.4226	1.51906	1.87837	2.39096	1.83642
431	serylleucine	Peptide	Dipeptide	40066	LC/MS Pos	2106	219.2	6665-16-3;				2.2177	2.2005	2.23619	1.23717	1.78929	0.156509	0.156509	1.64986	1.77958	1.58715	0.156509	0.156509
432	serylphenyalanine	Peptide	Dipeptide	40054	LC/MS Pos	2348	253.2					1.3929	1.83559	1.66445	1.69281	1.29774	1.25591	2.18743	0.408988	0.608524	2.06285	1.99579	2.01638
560	sorbitol	Carbohydrate	Fructose, mannose, galactose, starch, and sucrose metabolism	15053	GC/MS	1843	319.1	6706-59-8;	107428	C00794	HMDB00247	1.08524	1.1594	1.37612	1.01626	1.1565	1.0289	1.3091	1.91891	1.60119	1.89001	1.68463	1.12256
285	spermidine	Amino acid	Polyamine metabolism	485	LC/MS Pos	533	146.2	124-20-9;	1102	C00315	HMDB01257	1.28978	1.30773	1.24689	1.2871	1.21748	1.29364	1.32107	1.19144	1.02117	1.23391	1.38075	1.35907
288	spermine	Amino acid	Polyamine metabolism	603	LC/MS Pos	506	203.2	71-44-3;	1103	C00750	HMDB01256	1.48575	1.16613	0.359498	1.37588	0.705631	0.840654	1.28427	1.4465	1.28082	1.26811	1.03125	0.359498
1074	sphinganine	Lipid	Sphingolipid	17769	LC/MS Pos	5175	302.3	3102-56-5;	3126	C00836	HMDB00269	1.01902	1.08997	1.58127	1.11387	1.20674	0.98098	0.52197	0.456705	0.419218	0.715401	0.512317	0.632669
1077	sphingosine	Lipid	Sphingolipid	17747	LC/MS Pos	5197	300.2	123-78-4;	5353955	C00319	HMDB00252	0.53948	0.372977	0.461352	0.354532	0.423483	0.401811	0.56091	0.632128	0.814345	0.772924	0.652634	0.651869
706	stearate (18:0)	Lipid	Long chain fatty acid	1358	LC/MS Neg	5886	283.4	57-11-4;	5281	C01530	HMDB00827	0.833121	0.954166	1.73007	0.993618	1.82682	0.806401	0.914248	0.849031	0.949236	1.07495	1.15492	1.11817
1087	stearoyl sphingomyelin	Lipid	Sphingolipid	19503	GC/MS	2645	311.3	85187-10-6;85187-10-6 ;	6453725	C00550	HMDB01348	0.495763	0.536234	0.50299	0.424127	0.522578	0.392602	0.832316	0.930902	1.06935	0.846203	0.883867	0.817665
913	stearoylcarnitine	Lipid	Carnitine metabolism	34409	LC/MS Pos	5300	428.4	18822-91-8;			HMDB00848	1.59342	1.15444	0.941757	1.09602	1.23125	1.40628	1.19551	0.828196	1.05824	1.06129	1.4772	1.14767
1617	streptomycin	Xenobiotics	Drug	39872	LC/MS Pos	543.3	300.8	3810-74-0;	5999			0.792513	0.792513	0.792513	0.792513	0.792513	0.792513	0.792513	0.792513	0.792513	0.792513	0.792513	0.792513
659	succinate	Energy	Krebs cycle	1437	GC/MS	1348	247	110-15-6;	1110	C00042	HMDB00254	1.69732	2.24622	2.17667	1.92365	2.28449	1.68639	1.55106	1.08986	0.964149	1.17473	1.5951	1.53373
233	taurine	Amino acid	Cysteine, methionine, SAM, taurine metabolism	2125	GC/MS	1616.4	254.1	107-35-7;	11234068592	C00245	HMDB00251	6.49214	7.44845	7.17612	5.82725	6.93185	6.78303	13.0846	13.8358	14.0869	16.2927	16.4805	11.8184
1368	thiamin (Vitamin B1)	Cofactors and vitamins	Thiamine metabolism	5341	LC/MS Pos	740	265.1	59-43-8;				1.34999	0.757244	0.63234	0.866732	0.691906	1.06253	1.35742	1.24298	1.6405	1.34864	1.79835	1.14617
17	threonine	Amino acid	Glycine, serine and threonine metabolism	1284	GC/MS	1412.3	218.1	72-19-5;	69710196288	C00188	HMDB00167	1.23048	1.46005	1.50171	1.3403	1.46899	1.30868	1.48803	1.06902	1.17895	1.43537	1.88654	1.43477
433	threonylleucine	Peptide	Dipeptide	40051	LC/MS Pos	2204	233.2	50299-12-2;	4420322			1.02965	1.31361	1.35986	1.65225	1.16614	1.23527	2.60722	1.48192	0.970354	2.6174	1.79134	1.94483
826	thromboxane B2	Lipid	Eicosanoid	17807	LC/MS Neg	4520	369.3	54397-85-2;	5283137	C05963	HMDB03252	0.069493	0.069493	0.069493	0.069493	0.069493	0.069493	0.069493	0.069493	0.069493	0.069493	0.069493	0.069493
217	tiglyl carnitine	Amino acid	Valine, leucine and isoleucine metabolism	35428	LC/MS Pos	2317	244.1	64191-86-2;			HMDB02366	0.529763	0.971313	1.1735	0.800351	1.9209	1.00096	1.54921	0.999043	1.20307	1.38605	2.06686	1.774
267	trans-4-hydroxyproline	Amino acid	Urea cycle; arginine-, proline-, metabolism	32306	LC/MS Pos	705	132.1	51-35-4;	58106971053	C01157	HMDB00725	3.14348	3.53618	3.01377	3.04367	3.19171	3.38292	1.7628	1.74407	2.07823	1.82262	2.2744	1.81107
1455	trizma acetate	Xenobiotics	Chemical	20710	GC/MS	1525	306.2	6850-28-8;	8129116218782	C07182		0.339763	0.339763	0.339763	0.339763	0.339763	0.339763	0.339763	0.339763	0.339763	0.339763	0.339763	0.339763
153	tryptophan	Amino acid	Tryptophan metabolism	54	LC/MS Pos	2445	205.1	73-22-3;	69235166305	C00078	HMDB00929	0.996676	1.1346	1.11981	1.10921	1.10857	1.10784	1.23715	0.961631	1.02225	1.216	1.50494	1.21426
106	tyrosine	Amino acid	Phenylalanine & tyrosine metabolism	1299	LC/MS Pos	1516	182.1	60-18-4;	60576942100	C00082	HMDB00158	0.961374	1.0688	1.19118	1.04122	1.12594	1.00222	1.64005	1.36603	1.37496	1.6263	1.92622	1.50688
630	UDP-glucose	Carbohydrate	Nucleotide sugars, pentose metabolism	32344	GC/MS	1986	243.1	117756-22-6;	8629	C00029	HMDB00286	1.80337	1.93566	1.7813	1.78377	1.86414	1.48894	1	1.81608	1.70276	1.56333	1.93792	1.17469
631	UDP-glucuronate	Carbohydrate	Nucleotide sugars, pentose metabolism	2763	LC/MS Neg	594	579.1	28053-08-9;63700-19-6;	17473	C00167	HMDB00935	2.64725	2.72286	2.57401	2.51816	2.72986	2.24127	1.08673	1	0.972912	1.02395	1.15437	1.11216
1277	uracil	Nucleotide	Pyrimidine metabolism, uracil containing	605	GC/MS	1370.4	241	66-22-8;	1174	C00106	HMDB00300	0.023115	0.021801	0.033383	0.028571	0.016886	0.020902	0.107807	0.175533	0.131584	0.170123	0.134483	0.09104
1247	urate	Nucleotide	Purine metabolism, urate metabolism	1604	GC/MS	1928	441.2	69-93-2;120K5305;		C00366	HMDB00289	0.975036	1.02496	1.48718	0.720501	1.17012	0.608956	0.608956	0.608956	0.608956	0.608956	0.608956	0.608956
260	urea	Amino acid	Urea cycle; arginine-, proline-, metabolism	1670	GC/MS	1223.9	171	57-13-6;	117616150869	C00086	HMDB00294	0.62324	0.903848	1.05155	0.891497	1.01889	0.76943	0.659752	0.777854	0.699076	0.698103	0.805386	0.697425
1279	uridine	Nucleotide	Pyrimidine metabolism, uracil containing	606	LC/MS Neg	1467	243.1	58-96-8;	6029	C00299	HMDB00296	0.501932	0.701965	0.834764	0.824464	0.932482	0.616823	1.06523	1.20823	1.01039	1.24582	1.3384	1.31204
1289	uridine 5'-diphosphate (UDP)	Nucleotide	Pyrimidine metabolism, uracil containing	5345	LC/MS Neg	606	403	21931-53-3;	6031	C00015	HMDB00295	2.39223	2.67894	2.17011	2.03946	2.37024	2.33973	0.524794	0.458846	0.623544	0.276463	0.707592	0.574214
1290	uridine 5'-triphosphate (UTP)	Nucleotide	Pyrimidine metabolism, uracil containing	33448	LC/MS Neg	639	483	19817-92-6;	6133	C00075	HMDB00285	2.38892	1.72898	1.31066	1.78604	1.40037	1.70499	0.928494	0.918233	1.09798	0.903183	0.879867	1.08835
1287	uridine monophosphate (5' or 3')	Nucleotide	Pyrimidine metabolism, uracil containing	39879	LC/MS Pos	1079	325					1.01873	1.39248	1.42559	1.18385	1.52236	1.41656	0.78235	0.78235	0.78235	0.78235	0.78235	0.78235
892	valerylcarnitine	Lipid	Fatty acid metabolism	34406	LC/MS Pos	2584	246.2		6426903		HMDB13128	1.17199	1.07083	1.16764	1.02705	1.1267	1	3.49633	2.36032	3.15184	3.58381	4.29648	3.24357
200	valine	Amino acid	Valine, leucine and isoleucine metabolism	1649	LC/MS Pos	1040	118.1	72-18-4;	69710186287	C00183	HMDB00883	1.00039	1.18563	1.16965	1.14031	1.2718	1.12263	1.64915	1.18174	1.22522	1.47586	1.9647	1.53304
449	valylglycine	Peptide	Dipeptide	40475	LC/MS Pos	1330	175.1	686-43-1;	136487			0.954869	1.36878	1.13548	1.27133	1.32082	1.33511	1.11878	0.5594	0.604031	0.987711	1.01229	1.21164
1187	xanthine	Nucleotide	Purine metabolism, (hypo)xanthine/inosine containing	3147	GC/MS	1889.9	353	69-89-6;	1188	C00385	HMDB00292	0.387205	0.632529	0.387205	0.947415	0.653755	0.387205	0.521872	0.516022	0.783548	1.15051	1.30923	1.05259
633	xylitol	Carbohydrate	Nucleotide sugars, pentose metabolism	41319	GC/MS	1677.6	217	87-99-0;	6912	C00379	HMDB00568	1.98257	2.39644	2.24868	2.18675	2.17001	2.2321	3.26778	2.6814	2.18097	2.85281	3.64821	2.73378
638	xylonate	Carbohydrate	Nucleotide sugars, pentose metabolism	35638	GC/MS	1722	292	73686-31-7;	6602431	C00502,C05411		0.295799	0.323509	0.259529	0.456703	0.251432	0.279331	2.00386	1.61145	1.5433	2.2564	2.40489	1.92003
637	xylose	Carbohydrate	Nucleotide sugars, pentose metabolism	15835	GC/MS	1723.9	204	609-06-3;	95259	C00181	HMDB00098	0.407621	0.365705	0.350997	0.43223	0.350997	0.462712	1.05282	1.0193	1.08132	1.19848	1.14768	1
